# Supplementary material for: Spatial Scaling of Environmental Variables Improves Species-Habitat Models of Fishes in a Small, Sand-Bed Lowland River
Source: PubMed Central journal article supplement (PMC4646645; doi:10.1371/journal.pone.0142813), 2015-11-16

**S1 Figure.** Overview on the overall hydromorphological status of the modelled River Treene (catchment: 760 km<sup>2</sup>) and existing migration barriers. Large parts of the river have been straightened; 66% of its length is in a poor (orange) or bad (red) hydromorphological state, only some few short near-natural meandering reaches are still present (1.5% of the river length, green). The river network is fragmented by a total of 52 barriers (0.16/km, black triangles). Hydromorphological data were kindly provided by the State Agency for Agriculture, Environment and Rural Areas (LLUR) of the federal state of Schleswig Holstein (status May 2011).

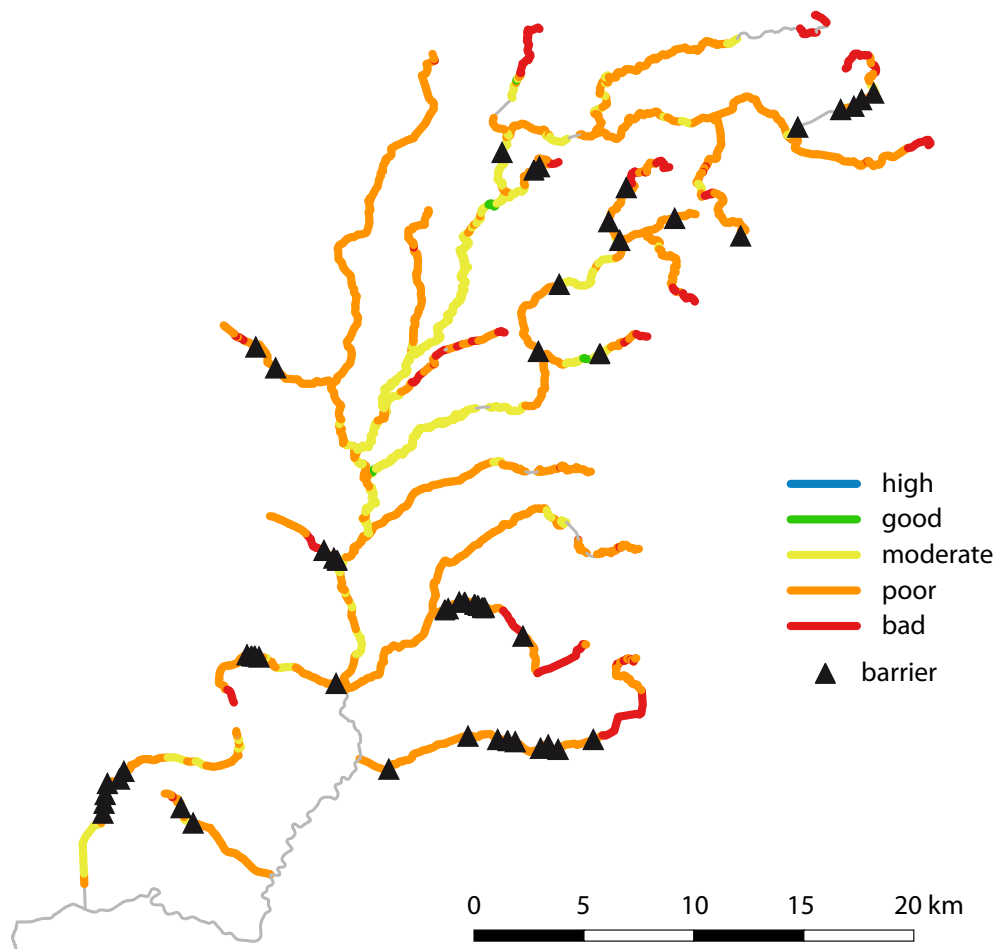

Supplement: pone.0142813.s001.pdf [file pone.0142813.s001.pdf]
