# Supplementary material for: Spatial Scaling of Environmental Variables Improves Species-Habitat Models of Fishes in a Small, Sand-Bed Lowland River
Source: PubMed Central journal article supplement (PMC4646645; doi:10.1371/journal.pone.0142813), 2015-11-16
Supplement: pone.0142813.s002.pdf [file pone.0142813.s002.pdf]

**S1 Table. Relative contribution of each predictor across five focal distance classes using measured hydromorphological variables (MV) and with/without topological variables (TV).** Descriptive information about predictor variables and corresponding values are provided in Table 2. Relative contribution (%) measured as the number of times a variable is used for splitting, weighted by the squared improvement at each split and averaged over all trees (Elith et al., 2008). Values in parenthesis indicate importance rank of each variable.

| Dataset  | Variable | incl. TV |           |           |           |           | excl. TV  |           |           |           |           |           |
|----------|----------|----------|-----------|-----------|-----------|-----------|-----------|-----------|-----------|-----------|-----------|-----------|
|          |          | 0        | 200       | 1000      | 2500      | 4000      | 0         | 200       | 1000      | 2500      | 4000      |           |
| Anguilla |          |          |           |           |           |           |           |           |           |           |           |           |
|          | TV       | DisM     | 23.73 (1) | 7.78 (7)  | 4.15 (9)  | 4.30 (8)  | 0         |           |           |           |           |           |
|          | TV       | SOSh     | 0         | 0.13 (19) | 0         | 0         | 0         |           |           |           |           |           |
|          | TV       | SOSst    | 18.21 (3) | 9.12 (4)  | 7.46 (6)  | 0.31 (20) | 0         |           |           |           |           |           |
|          | MV       | BAEr     | 0         | 0.16 (18) | 1.12 (14) | 2.23 (14) | 0         | 0         | 0         | 0         | 2.02 (13) | 0         |
|          | MV       | BAOt     | 0         | 2.14 (13) | 0         | 0         | 0         | 0         | 0         | 0         | 1.58 (14) | 0         |
|          | MV       | BAWa     | 0         | 0.40 (16) | 0         | 1.00 (17) | 0         | 0         | 0         | 0         | 0.99 (16) | 0         |
|          | MV       | BFLW     | 0         | 0.07 (22) | 0         | 0         | 0         | 0         | 0         | 0         | 0         | 0         |
|          | MV       | BFOt     | 0         | 0         | 0         | 1.23 (15) | 0         | 0         | 0         | 0         | 0.94 (17) | 0         |
|          | MV       | BPGr     | 0         | 0         | 0         | 0         | 0         | 0         | 0         | 0         | 0         | 0         |
|          | MV       | BPMa     | 0         | 0         | 0         | 0         | 0         | 0         | 0         | 0         | 0         | 0         |
|          | MV       | BPno     | 0         | 0.30 (17) | 2.92 (10) | 0.92 (18) | 0         | 0         | 0         | 6.04 (8)  | 0.88 (18) | 0         |
|          | MV       | BPRi     | 0         | 0         | 0         | 0         | 0         | 0         | 0         | 0         | 0         | 0         |
|          | MV       | BPWo     | 0         | 0.09 (20) | 2.68 (11) | 3.09 (9)  | 17.72 (5) | 0         | 0         | 0         | 2.84 (10) | 0         |
|          | MV       | CBFO     | 0         | 0         | 0         | 0         | 0         | 0         | 0         | 0         | 0         | 0         |
|          | MV       | CBFR     | 0         | 1.13 (15) | 0         | 2.62 (12) | 0         | 0         | 0         | 0         | 3.20 (8)  | 0         |
|          | MV       | CFIB     | 0         | 0         | 0         | 0.35 (19) | 0         | 0         | 0         | 0         | 0         | 0         |
|          | MV       | CFLW     | 0         | 0.00 (23) | 0         | 0         | 0         | 0         | 0         | 0         | 0         | 0         |
|          | MV       | CFNa     | 0         | 0         | 0         | 0         | 0         | 0         | 0         | 0         | 0         | 0         |
|          | MV       | CFWi     | 0         | 0.07 (21) | 0         | 0         | 0         | 0         | 0         | 0         | 0         | 0         |
|          | MV       | ChDe     | 19.24 (2) | 9.03 (5)  | 4.28 (8)  | 20.79 (1) | 26.16 (1) | 27.03 (2) | 0         | 6.66 (6)  | 22.12 (1) | 64.17 (1) |
|          | MV       | ChDV     | 0         | 0         | 0         | 2.79 (11) | 0         | 0         | 0         | 0         | 2.82 (11) | 0         |
|          | MV       | ChWi     | 13.14 (5) | 17.00 (1) | 16.53 (2) | 16.64 (2) | 18.70 (3) | 36.80 (1) | 60.12 (1) | 19.16 (1) | 17.80 (2) | 35.83 (2) |
|          | MV       | ChWV     | 0         | 0         | 0         | 0         | 0         | 0         | 0         | 0         | 0         | 0         |
|          | MV       | CSFo     | 0         | 0         | 0         | 0         | 0         | 0         | 0         | 0         | 0         | 0         |
|          | MV       | FLDi     | 0         | 0         | 0         | 0         | 0         | 0         | 0         | 0         | 0         | 0         |
|          | MV       | FLVe     | 0         | 0         | 0         | 0         | 0         | 0         | 0         | 0         | 0         | 0         |
|          | MV       | InVe     | 0         | 0         | 0         | 0         | 0         | 0         | 0         | 0         | 0         | 0         |
|          | MV       | Plan     | 0         | 0         | 0         | 0         | 0         | 0         | 0         | 0         | 0         | 0         |
|          | MV       | RVRe     | 0         | 0         | 0         | 0         | 0         | 0         | 0         | 0         | 0         | 0         |
|          | MV       | RVSp     | 0         | 2.83 (12) | 5.04 (7)  | 1.12 (16) | 0         | 0         | 0         | 6.63 (7)  | 1.03 (15) | 0         |
|          | MV       | RVTF     | 0         | 10.55 (3) | 17.47 (1) | 5.80 (6)  | 19.70 (2) | 0         | 0         | 16.67 (2) | 5.44 (6)  | 0         |
|          | MV       | SMaS     | 0         | 4.52 (10) | 11.92 (4) | 2.79 (10) | 0         | 0         | 0         | 14.03 (4) | 2.43 (12) | 0         |

| Dataset  | Variable | incl. TV  |           |           |           |           | excl. TV  |           |           |           |           |
|----------|----------|-----------|-----------|-----------|-----------|-----------|-----------|-----------|-----------|-----------|-----------|
|          |          | 0         | 200       | 1000      | 2500      | 4000      | 0         | 200       | 1000      | 2500      | 4000      |
| MV       | SuDi     | 17.80 (4) | 12.42 (2) | 7.63 (5)  | 5.37 (7)  | 0         | 22.76 (3) | 39.88 (2) | 10.54 (5) | 6.11 (5)  | 0         |
| MV       | SuHa     | 0         | 1.83 (14) | 0         | 6.03 (5)  | 0         | 0         | 0         | 0         | 5.43 (7)  | 0         |
| MV       | SuMa     | 0         | 4.74 (8)  | 14.69 (3) | 8.58 (4)  | 17.72 (4) | 0         | 0         | 16.15 (3) | 9.15 (4)  | 0         |
| MV       | SuSa     | 7.89 (6)  | 4.57 (9)  | 1.07 (15) | 0         | 0         | 13.40 (4) | 0         | 0         | 0         | 0         |
| MV       | SuSo     | 0         | 2.89 (11) | 1.24 (13) | 2.56 (13) | 0         | 0         | 0         | 2.39 (9)  | 2.93 (9)  | 0         |
| MV       | SuWo     | 0         | 8.26 (6)  | 1.80 (12) | 11.47 (3) | 0         | 0         | 0         | 1.72 (10) | 12.30 (3) | 0         |
| Cobienia |          |           |           |           |           |           |           |           |           |           |           |
| TV       | DisM     | 21.44 (2) | 0         | 15.00 (3) | 0         | 2.09 (18) |           |           |           |           |           |
| TV       | SOSh     | 22.95 (1) | 30.59 (2) | 19.83 (1) | 0         | 0         |           |           |           |           |           |
| TV       | SOSSt    | 12.35 (5) | 0         | 9.31 (7)  | 38.78 (2) | 13.70 (1) |           |           |           |           |           |
| MV       | BAEr     | 0         | 0         | 0         | 0         | 3.56 (13) | 0         | 0         | 0         | 3.97 (9)  | 0         |
| MV       | BAOt     | 0         | 0         | 17.71 (2) | 0         | 5.11 (7)  | 0         | 0         | 0         | 5.66 (6)  | 8.50 (7)  |
| MV       | BAWa     | 0         | 0         | 0         | 0         | 0.61 (24) | 0         | 0         | 0         | 0         | 0         |
| MV       | BFLW     | 0         | 0         | 0         | 0         | 0.83 (22) | 0         | 0         | 0         | 18.73 (1) | 0         |
| MV       | BFOt     | 0         | 0         | 0         | 0         | 0         | 0         | 0         | 0         | 0         | 0         |
| MV       | BPGr     | 0         | 0         | 0         | 0         | 0         | 0         | 0         | 0         | 0         | 0         |
| MV       | BPMa     | 0         | 0         | 0         | 0         | 0         | 0         | 0         | 0         | 0         | 0         |
| MV       | BPno     | 0         | 0         | 0         | 0         | 4.51 (9)  | 0         | 0         | 0         | 15.08 (2) | 10.33 (6) |
| MV       | BPRi     | 0         | 0         | 0         | 0         | 6.24 (6)  | 0         | 0         | 0         | 0         | 0         |
| MV       | BPWo     | 0         | 0         | 0         | 0         | 0         | 0         | 0         | 0         | 0         | 0         |
| MV       | CBFO     | 0         | 0         | 0         | 0         | 7.21 (4)  | 0         | 0         | 0         | 0         | 11.95 (4) |
| MV       | CBFR     | 0         | 0         | 0         | 0         | 1.15 (20) | 0         | 0         | 0         | 0         | 0         |
| MV       | CFIB     | 0         | 0         | 0         | 0         | 9.23 (2)  | 0         | 0         | 0         | 3.22 (12) | 16.95 (1) |
| MV       | CFLW     | 0         | 0         | 0         | 0         | 3.23 (14) | 0         | 0         | 0         | 0         | 0         |
| MV       | CFNa     | 0         | 0         | 0         | 0         | 3.88 (12) | 0         | 0         | 0         | 0         | 0         |
| MV       | CFWi     | 0         | 0         | 0         | 0         | 1.43 (19) | 0         | 0         | 0         | 0         | 0         |
| MV       | ChDe     | 0         | 0         | 0         | 0         | 4.00 (10) | 0         | 0         | 0         | 4.63 (8)  | 13.81 (3) |
| MV       | ChDV     | 0         | 0         | 0         | 0         | 0         | 0         | 0         | 0         | 6.10 (5)  | 0         |
| MV       | ChWi     | 15.87 (4) | 23.74 (3) | 13.23 (5) | 0         | 2.60 (17) | 55.18 (1) | 48.73 (2) | 56.27 (1) | 14.00 (4) | 8.00 (8)  |
| MV       | ChWV     | 0         | 0         | 0         | 0         | 0         | 0         | 0         | 0         | 0         | 0         |
| MV       | CSFo     | 0         | 0         | 0         | 0         | 0         | 0         | 0         | 0         | 0         | 0         |
| MV       | FIDi     | 0         | 0         | 0         | 0         | 0         | 0         | 0         | 0         | 0         | 0         |
| MV       | FIVe     | 0         | 0         | 0         | 0         | 0         | 0         | 0         | 0         | 0         | 0         |
| MV       | InVe     | 0         | 0         | 0         | 0         | 0         | 0         | 0         | 0         | 0         | 0         |
| MV       | Plan     | 0         | 0         | 0         | 0         | 0         | 0         | 0         | 0         | 0         | 0         |
| MV       | RVRe     | 0         | 0         | 0         | 0         | 0         | 0         | 0         | 0         | 0         | 0         |
| MV       | RVSp     | 0         | 0         | 0         | 0         | 0.64 (23) | 0         | 0         | 0         | 0         | 0         |
| MV       | RVTF     | 0         | 0         | 0         | 0         | 2.85 (15) | 0         | 0         | 0         | 1.58 (13) | 5.02 (9)  |

| Dataset  | Variable | incl. TV  |           |           |           |           | excl. TV  |           |           |           |           |
|----------|----------|-----------|-----------|-----------|-----------|-----------|-----------|-----------|-----------|-----------|-----------|
|          |          | 0         | 200       | 1000      | 2500      | 4000      | 0         | 200       | 1000      | 2500      | 4000      |
| MV       | SMaS     | 0         | 0         | 0         | 0         | 0         | 0         | 0         | 0         | 0         | 0         |
| MV       | SuDi     | 18.96 (3) | 45.67 (1) | 14.02 (4) | 0         | 2.83 (16) | 35.53 (2) | 51.27 (1) | 43.73 (2) | 3.89 (10) | 0         |
| MV       | SuHa     | 8.43 (6)  | 0         | 0         | 0         | 4.73 (8)  | 9.29 (3)  | 0         | 0         | 0         | 0         |
| MV       | SuMa     | 0         | 0         | 0         | 0         | 0.98 (21) | 0         | 0         | 0         | 0         | 0         |
| MV       | SuSa     | 0         | 0         | 10.90 (6) | 0         | 3.90 (11) | 0         | 0         | 0         | 3.83 (11) | 0         |
| MV       | SuSo     | 0         | 0         | 0         | 61.22 (1) | 6.36 (5)  | 0         | 0         | 0         | 14.52 (3) | 11.60 (5) |
| MV       | SuWo     | 0         | 0         | 0         | 0         | 8.33 (3)  | 0         | 0         | 0         | 4.79 (7)  | 13.84 (2) |
| Gastatus |          |           |           |           |           |           |           |           |           |           |           |
| TV       | DisM     | 41.27 (2) | 0         | 7.79 (4)  | 3.24 (6)  | 0         |           |           |           |           |           |
| TV       | SOSh     | 0         | 0         | 0         | 0         | 0         |           |           |           |           |           |
| TV       | SOSSt    | 0         | 0         | 3.12 (9)  | 0.30 (22) | 0         |           |           |           |           |           |
| MV       | BAEr     | 0         | 0         | 2.32 (12) | 1.91 (12) | 0         | 0         | 0         | 0         | 0         | 0         |
| MV       | BAOt     | 0         | 0         | 0         | 2.06 (11) | 0         | 0         | 0         | 0         | 0         | 0         |
| MV       | BAWa     | 0         | 0         | 2.62 (10) | 0.74 (18) | 0         | 0         | 0         | 0         | 0         | 0         |
| MV       | BFLW     | 0         | 0         | 0         | 0.67 (19) | 0         | 0         | 0         | 0         | 0         | 0         |
| MV       | BFOt     | 0         | 0         | 0         | 0         | 0         | 0         | 0         | 0         | 0         | 0         |
| MV       | BPGr     | 0         | 0         | 0         | 0         | 0         | 0         | 0         | 0         | 0         | 0         |
| MV       | BPMa     | 0         | 0         | 0         | 0         | 0         | 0         | 0         | 0         | 0         | 0         |
| MV       | BPno     | 0         | 0         | 10.85 (2) | 0.83 (16) | 0         | 0         | 0         | 19.26 (2) | 0         | 0         |
| MV       | BPRi     | 0         | 0         | 0         | 0         | 0         | 0         | 0         | 0         | 0         | 0         |
| MV       | BPWo     | 0         | 0         | 0         | 0         | 0         | 0         | 0         | 0         | 0         | 0         |
| MV       | CBFO     | 0         | 0         | 0         | 0         | 0         | 0         | 0         | 0         | 0         | 0         |
| MV       | CBFR     | 0         | 0         | 0.76 (16) | 2.83 (7)  | 18.35 (2) | 0         | 0         | 0         | 0         | 22.35 (2) |
| MV       | CFIB     | 0         | 0         | 0         | 0         | 0         | 0         | 0         | 0         | 0         | 0         |
| MV       | CFLW     | 0         | 0         | 0         | 0         | 0         | 0         | 0         | 0         | 0         | 0         |
| MV       | CFNa     | 0         | 0         | 0         | 0         | 0         | 0         | 0         | 0         | 0         | 0         |
| MV       | CFWi     | 0         | 0         | 0         | 16.72 (2) | 0         | 0         | 0         | 0         | 0         | 0         |
| MV       | ChDe     | 0         | 0         | 3.76 (7)  | 6.35 (3)  | 0         | 0         | 0         | 14.30 (4) | 26.49 (2) | 0         |
| MV       | ChDV     | 0         | 0         | 0         | 0.42 (21) | 0         | 0         | 0         | 0         | 0         | 0         |
| MV       | ChWi     | 58.73 (1) | 67.26 (1) | 40.98 (1) | 43.06 (1) | 81.65 (1) | 85.01 (1) | 67.16 (1) | 51.69 (1) | 73.51 (1) | 77.65 (1) |
| MV       | ChWV     | 0         | 0         | 0         | 0.98 (14) | 0         | 0         | 0         | 0         | 0         | 0         |
| MV       | CSFo     | 0         | 0         | 0         | 0.57 (20) | 0         | 14.99 (2) | 0         | 0         | 0         | 0         |
| MV       | FDi      | 0         | 0         | 0         | 0         | 0         | 0         | 0         | 0         | 0         | 0         |
| MV       | FIVe     | 0         | 0         | 0         | 0         | 0         | 0         | 0         | 0         | 0         | 0         |
| MV       | InVe     | 0         | 0         | 0         | 0         | 0         | 0         | 0         | 0         | 0         | 0         |
| MV       | Plan     | 0         | 0         | 0         | 0         | 0         | 0         | 0         | 0         | 0         | 0         |
| MV       | RVRe     | 0         | 0         | 0         | 0         | 0         | 0         | 0         | 0         | 0         | 0         |
| MV       | RVSp     | 0         | 0         | 2.46 (11) | 0.18 (23) | 0         | 0         | 0         | 0         | 0         | 0         |

| Dataset  | Variable | incl. TV  |           |           |           |           | excl. TV  |           |           |           |           |
|----------|----------|-----------|-----------|-----------|-----------|-----------|-----------|-----------|-----------|-----------|-----------|
|          |          | 0         | 200       | 1000      | 2500      | 4000      | 0         | 200       | 1000      | 2500      | 4000      |
| MV       | RVTF     | 0         | 0         | 3.16 (8)  | 1.67 (13) | 0         | 0         | 0         | 0         | 0         | 0         |
| MV       | SMaS     | 0         | 0         | 0.87 (15) | 3.59 (5)  | 0         | 0         | 0         | 0         | 0         | 0         |
| MV       | SuDi     | 0         | 0         | 4.49 (6)  | 2.53 (9)  | 0         | 0         | 0         | 0         | 0         | 0         |
| MV       | SuHa     | 0         | 32.74 (2) | 1.01 (14) | 0.93 (15) | 0         | 0         | 32.84 (2) | 0         | 0         | 0         |
| MV       | SuMa     | 0         | 0         | 1.13 (13) | 0.75 (17) | 0         | 0         | 0         | 0         | 0         | 0         |
| MV       | SuSa     | 0         | 0         | 8.57 (3)  | 2.17 (10) | 0         | 0         | 0         | 14.75 (3) | 0         | 0         |
| MV       | SuSo     | 0         | 0         | 6.13 (5)  | 2.75 (8)  | 0         | 0         | 0         | 0         | 0         | 0         |
| MV       | SuWo     | 0         | 0         | 0         | 4.75 (4)  | 0         | 0         | 0         | 0         | 0         | 0         |
| Gobiobio |          |           |           |           |           |           |           |           |           |           |           |
| TV       | DisM     | 0         | 0         | 0         | 0         | 0         |           |           |           |           |           |
| TV       | SOSh     | 0         | 0         | 0         | 0         | 0         |           |           |           |           |           |
| TV       | SOST     | 5.01 (4)  | 0         | 1.23 (6)  | 1.59 (6)  | 2.63 (5)  |           |           |           |           |           |
| MV       | BAEr     | 0         | 0         | 0         | 0         | 0         | 0         | 0         | 0         | 0         | 0         |
| MV       | BAOt     | 0         | 0         | 0         | 0         | 0         | 0         | 0         | 12.23 (2) | 0         | 0         |
| MV       | BAWa     | 0         | 0         | 0         | 0         | 0         | 0         | 0         | 0         | 0         | 0         |
| MV       | BFLW     | 0         | 0         | 0         | 0         | 0         | 0         | 0         | 0         | 0         | 0         |
| MV       | BFOt     | 0         | 0         | 0         | 0         | 1.33 (7)  | 0         | 0         | 0         | 0         | 0         |
| MV       | BPGr     | 0         | 0         | 0         | 0         | 0         | 0         | 0         | 0         | 0         | 0         |
| MV       | BPMa     | 0         | 0         | 0         | 0         | 0         | 0         | 0         | 0         | 0         | 0         |
| MV       | BPno     | 0         | 0         | 0         | 0         | 0         | 0         | 0         | 0         | 0         | 0         |
| MV       | BPRi     | 0         | 0         | 0         | 0         | 0         | 0         | 0         | 0         | 0         | 0         |
| MV       | BPWo     | 0         | 0         | 0         | 0         | 0         | 0         | 0         | 0         | 0         | 0         |
| MV       | CBFO     | 0         | 0         | 0         | 0         | 0         | 0         | 0         | 0         | 0         | 0         |
| MV       | CBFR     | 0         | 0         | 0         | 0         | 0         | 0         | 0         | 0         | 0         | 0         |
| MV       | CFIB     | 0         | 0         | 0         | 0         | 0         | 0         | 0         | 0         | 0         | 0         |
| MV       | CFLW     | 0         | 0         | 0         | 0         | 0         | 0         | 0         | 0         | 0         | 0         |
| MV       | CFNa     | 0         | 0         | 0         | 0         | 0         | 0         | 0         | 0         | 0         | 0         |
| MV       | CFWi     | 0         | 0         | 0         | 0         | 0         | 0         | 0         | 0         | 0         | 0         |
| MV       | ChDe     | 5.92 (3)  | 12.63 (2) | 2.91 (4)  | 7.04 (3)  | 14.27 (2) | 5.47 (3)  | 12.38 (2) | 1.92 (6)  | 7.27 (4)  | 18.95 (2) |
| MV       | ChDV     | 0         | 0         | 0         | 0         | 0         | 0         | 0         | 0         | 0         | 0         |
| MV       | ChWi     | 66.59 (1) | 87.37 (1) | 80.14 (1) | 69.74 (1) | 65.42 (1) | 73.58 (1) | 87.62 (1) | 74.79 (1) | 69.29 (1) | 81.05 (1) |
| MV       | ChWV     | 0         | 0         | 0         | 0         | 0         | 0         | 0         | 0         | 0         | 0         |
| MV       | CSFo     | 0         | 0         | 0         | 0         | 0         | 0         | 0         | 0         | 0         | 0         |
| MV       | FDi      | 0         | 0         | 0         | 0         | 0         | 0         | 0         | 0         | 0         | 0         |
| MV       | FIVe     | 0         | 0         | 0         | 0         | 0         | 0         | 0         | 0         | 0         | 0         |
| MV       | InVe     | 0         | 0         | 0         | 0         | 0         | 0         | 0         | 0         | 0         | 0         |
| MV       | Plan     | 0         | 0         | 0         | 0         | 0         | 0         | 0         | 0         | 0         | 0         |
| MV       | RVRe     | 0         | 0         | 0         | 0         | 0         | 0         | 0         | 0         | 0         | 0         |

| Dataset  | Variable | incl. TV  |           |           |           |           | excl. TV  |           |           |           |           |
|----------|----------|-----------|-----------|-----------|-----------|-----------|-----------|-----------|-----------|-----------|-----------|
|          |          | 0         | 200       | 1000      | 2500      | 4000      | 0         | 200       | 1000      | 2500      | 4000      |
| MV       | RVSp     | 0         | 0         | 2.30 (5)  | 0         | 0         | 0         | 0         | 2.98 (4)  | 0         | 0         |
| MV       | RVTF     | 0         | 0         | 0         | 0         | 0         | 0         | 0         | 0         | 0         | 0         |
| MV       | SMaS     | 0         | 0         | 0         | 0         | 7.12 (4)  | 0         | 0         | 0         | 0         | 0         |
| MV       | SuDi     | 0         | 0         | 0         | 10.68 (2) | 0         | 0         | 0         | 0         | 11.01 (2) | 0         |
| MV       | SuHa     | 0         | 0         | 0         | 0         | 0         | 0         | 0         | 0         | 0         | 0         |
| MV       | SuMa     | 0         | 0         | 0         | 0         | 0         | 0         | 0         | 0         | 0         | 0         |
| MV       | SuSa     | 0         | 0         | 6.88 (2)  | 6.25 (4)  | 7.56 (3)  | 0         | 0         | 5.57 (3)  | 8.37 (3)  | 0         |
| MV       | SuSo     | 22.48 (2) | 0         | 6.53 (3)  | 4.70 (5)  | 1.67 (6)  | 20.95 (2) | 0         | 2.52 (5)  | 0         | 0         |
| MV       | SuWo     | 0         | 0         | 0         | 0         | 0         | 0         | 0         | 0         | 4.06 (5)  | 0         |
| Gymnrnua |          |           |           |           |           |           |           |           |           |           |           |
| TV       | DisM     | 35.25 (2) | 19.69 (3) | 17.36 (2) | 15.95 (2) | 18.45 (4) |           |           |           |           |           |
| TV       | SOSh     | 37.07 (1) | 20.69 (2) | 28.74 (1) | 20.62 (1) | 0         |           |           |           |           |           |
| TV       | SOSSt    | 0         | 0         | 0         | 0         | 0         |           |           |           |           |           |
| MV       | BAEr     | 0         | 0         | 0         | 8.72 (5)  | 0         | 0         | 0         | 0         | 12.28 (5) | 0         |
| MV       | BAOt     | 0         | 0         | 11.66 (3) | 6.99 (7)  | 0         | 0         | 0         | 0         | 10.66 (6) | 10.57 (5) |
| MV       | BAWa     | 0         | 0         | 0         | 0         | 0         | 0         | 0         | 0         | 0         | 0         |
| MV       | BFLW     | 0         | 0         | 0         | 13.61 (3) | 19.98 (2) | 0         | 0         | 0         | 20.34 (1) | 17.44 (3) |
| MV       | BFOt     | 0         | 0         | 0         | 0         | 0         | 0         | 0         | 0         | 0         | 0         |
| MV       | BPGr     | 0         | 0         | 0         | 0         | 0         | 0         | 0         | 0         | 0         | 0         |
| MV       | BPMa     | 0         | 0         | 0         | 0         | 0         | 0         | 0         | 0         | 0         | 0         |
| MV       | BPno     | 0         | 0         | 0         | 0         | 0         | 0         | 0         | 0         | 0         | 0         |
| MV       | BPRi     | 0         | 0         | 0         | 0         | 0         | 0         | 0         | 0         | 0         | 0         |
| MV       | BPWo     | 0         | 0         | 0         | 0         | 0         | 0         | 0         | 0         | 0         | 0         |
| MV       | CBFO     | 0         | 0         | 0         | 0         | 0         | 0         | 0         | 0         | 0         | 0         |
| MV       | CBFR     | 0         | 0         | 0         | 0         | 0         | 0         | 0         | 0         | 0         | 0         |
| MV       | CFIB     | 0         | 0         | 0         | 0         | 0         | 0         | 0         | 0         | 0         | 0         |
| MV       | CFLW     | 0         | 0         | 0         | 0         | 30.51 (1) | 0         | 0         | 0         | 0         | 23.72 (1) |
| MV       | CFNa     | 0         | 0         | 0         | 0         | 0         | 0         | 0         | 0         | 0         | 0         |
| MV       | CFWi     | 0         | 0         | 0         | 0         | 0         | 0         | 0         | 0         | 0         | 0         |
| MV       | ChDe     | 8.99 (4)  | 15.05 (4) | 5.19 (8)  | 8.51 (6)  | 0         | 23.80 (2) | 29.13 (2) | 26.00 (2) | 16.67 (3) | 4.03 (7)  |
| MV       | ChDV     | 0         | 0         | 0         | 0         | 0         | 0         | 0         | 0         | 0         | 0         |
| MV       | ChWi     | 18.69 (3) | 11.86 (5) | 10.12 (5) | 5.13 (8)  | 19.48 (3) | 76.20 (1) | 23.73 (3) | 49.04 (1) | 15.26 (4) | 19.40 (2) |
| MV       | ChWV     | 0         | 0         | 0         | 0         | 0         | 0         | 0         | 0         | 0         | 0         |
| MV       | CSFo     | 0         | 0         | 0         | 0         | 0         | 0         | 0         | 0         | 0         | 0         |
| MV       | FIDi     | 0         | 0         | 0         | 0         | 0         | 0         | 0         | 0         | 0         | 0         |
| MV       | FIVe     | 0         | 0         | 0         | 0         | 0         | 0         | 0         | 0         | 0         | 0         |
| MV       | InVe     | 0         | 0         | 0         | 0         | 0         | 0         | 0         | 0         | 0         | 0         |
| MV       | Plan     | 0         | 0         | 0         | 0         | 0         | 0         | 0         | 0         | 0         | 0         |

| Dataset   | Variable | incl. TV  |           |           |           |           | excl. TV  |           |           |           |           |
|-----------|----------|-----------|-----------|-----------|-----------|-----------|-----------|-----------|-----------|-----------|-----------|
|           |          | 0         | 200       | 1000      | 2500      | 4000      | 0         | 200       | 1000      | 2500      | 4000      |
| MV        | RVRe     | 0         | 0         | 0         | 0         | 0         | 0         | 0         | 0         | 0         | 0         |
| MV        | RVSp     | 0         | 0         | 0         | 0         | 0         | 0         | 0         | 0         | 0         | 0         |
| MV        | RVTF     | 0         | 0         | 0         | 3.31 (10) | 0         | 0         | 0         | 0         | 0         | 0         |
| MV        | SMaS     | 0         | 0         | 11.43 (4) | 0         | 0         | 0         | 0         | 0         | 0         | 0         |
| MV        | SuDi     | 0         | 27.59 (1) | 0         | 12.56 (4) | 0         | 0         | 38.57 (1) | 0         | 16.86 (2) | 16.81 (4) |
| MV        | SuHa     | 0         | 0         | 0         | 0         | 0         | 0         | 0         | 0         | 0         | 0         |
| MV        | SuMa     | 0         | 5.12 (6)  | 8.96 (6)  | 0         | 0         | 0         | 8.57 (4)  | 24.96 (3) | 0         | 0         |
| MV        | SuSa     | 0         | 0         | 6.55 (7)  | 0         | 0         | 0         | 0         | 0         | 0         | 0         |
| MV        | SuSo     | 0         | 0         | 0         | 4.60 (9)  | 11.57 (5) | 0         | 0         | 0         | 7.94 (7)  | 8.04 (6)  |
| MV        | SuWo     | 0         | 0         | 0         | 0         | 0         | 0         | 0         | 0         | 0         | 0         |
| Leuciscus |          |           |           |           |           |           |           |           |           |           |           |
| TV        | DisM     | 27.01 (1) | 24.88 (1) | 29.48 (2) | 0         | 0         |           |           |           |           |           |
| TV        | SOSh     | 0         | 0         | 0         | 0         | 0         |           |           |           |           |           |
| TV        | SOSSt    | 0         | 0         | 0         | 0         | 0         |           |           |           |           |           |
| MV        | BAEr     | 0         | 0         | 0         | 0         | 0         | 0         | 0         | 0         | 0         | 0         |
| MV        | BAOt     | 0         | 0         | 0         | 0         | 0         | 0         | 0         | 0         | 0         | 0         |
| MV        | BAWa     | 0         | 0         | 0         | 0         | 0         | 0         | 0         | 0         | 0         | 0         |
| MV        | BFLW     | 0         | 0         | 0         | 0         | 0         | 0         | 0         | 0         | 0         | 0         |
| MV        | BFOt     | 0         | 0         | 0         | 0         | 0         | 0         | 0         | 0         | 0         | 19.01 (3) |
| MV        | BPGGr    | 0         | 0         | 0         | 0         | 0         | 0         | 0         | 0         | 0         | 0         |
| MV        | BPMA     | 0         | 0         | 0         | 0         | 0         | 0         | 0         | 0         | 0         | 0         |
| MV        | BPno     | 0         | 0         | 0         | 0         | 0         | 0         | 0         | 0         | 0         | 0         |
| MV        | BPRi     | 0         | 0         | 0         | 0         | 0         | 0         | 0         | 0         | 0         | 0         |
| MV        | BPWo     | 0         | 0         | 0         | 0         | 0         | 0         | 0         | 0         | 0         | 0         |
| MV        | CBFO     | 0         | 0         | 0         | 0         | 0         | 0         | 0         | 0         | 0         | 0         |
| MV        | CBFR     | 0         | 0         | 0         | 0         | 0         | 0         | 0         | 0         | 0         | 0         |
| MV        | CFIB     | 0         | 0         | 0         | 0         | 0         | 0         | 0         | 0         | 0         | 0         |
| MV        | CFLW     | 0         | 0         | 0         | 0         | 0         | 0         | 0         | 0         | 0         | 0         |
| MV        | CFNa     | 0         | 0         | 0         | 0         | 0         | 0         | 0         | 0         | 0         | 0         |
| MV        | CFWi     | 0         | 0         | 0         | 0         | 0         | 0         | 0         | 0         | 0         | 0         |
| MV        | ChDe     | 8.78 (5)  | 18.47 (4) | 11.04 (4) | 18.71 (4) | 0         | 15.35 (4) | 22.54 (3) | 16.19 (3) | 19.31 (4) | 0         |
| MV        | ChDV     | 0         | 0         | 0         | 0         | 0         | 0         | 0         | 0         | 0         | 0         |
| MV        | ChWi     | 19.99 (3) | 22.50 (3) | 25.41 (3) | 25.37 (1) | 64.42 (1) | 27.36 (1) | 29.87 (2) | 33.34 (2) | 24.55 (2) | 50.58 (1) |
| MV        | ChWV     | 0         | 0         | 0         | 0         | 0         | 0         | 0         | 0         | 0         | 0         |
| MV        | CSFo     | 20.86 (2) | 0         | 0         | 21.79 (3) | 0         | 24.83 (2) | 0         | 0         | 22.18 (3) | 0         |
| MV        | FIDi     | 0         | 0         | 0         | 0         | 0         | 0         | 0         | 0         | 0         | 0         |
| MV        | FIVe     | 0         | 0         | 0         | 0         | 0         | 0         | 0         | 0         | 0         | 0         |
| MV        | InVe     | 0         | 0         | 0         | 0         | 0         | 0         | 0         | 0         | 0         | 0         |

| Dataset  | Variable | incl. TV  |           |           |           |           | excl. TV  |           |           |           |           |
|----------|----------|-----------|-----------|-----------|-----------|-----------|-----------|-----------|-----------|-----------|-----------|
|          |          | 0         | 200       | 1000      | 2500      | 4000      | 0         | 200       | 1000      | 2500      | 4000      |
| MV       | Plan     | 0         | 0         | 0         | 0         | 0         | 0         | 0         | 0         | 0         | 0         |
| MV       | RVRe     | 0         | 0         | 0         | 0         | 0         | 0         | 0         | 0         | 0         | 0         |
| MV       | RVSp     | 0         | 0         | 0         | 0         | 0         | 0         | 0         | 0         | 0         | 0         |
| MV       | RVTF     | 0         | 0         | 0         | 0         | 0         | 0         | 0         | 0         | 0         | 0         |
| MV       | SMaS     | 0         | 0         | 0         | 0         | 0         | 0         | 0         | 0         | 0         | 0         |
| MV       | SuDi     | 0         | 0         | 0         | 0         | 0         | 0         | 0         | 0         | 0         | 0         |
| MV       | SuHa     | 0         | 0         | 0         | 0         | 0         | 0         | 0         | 0         | 0         | 0         |
| MV       | SuMa     | 0         | 0         | 0         | 0         | 0         | 0         | 0         | 0         | 0         | 0         |
| MV       | SuSa     | 6.76 (6)  | 9.61 (5)  | 0         | 9.07 (5)  | 0         | 10.00 (5) | 16.83 (4) | 0         | 8.94 (5)  | 0         |
| MV       | SuSo     | 16.60 (4) | 24.53 (2) | 34.06 (1) | 25.07 (2) | 35.58 (2) | 22.46 (3) | 30.76 (1) | 50.47 (1) | 25.02 (1) | 30.41 (2) |
| MV       | SuWo     | 0         | 0         | 0         | 0         | 0         | 0         | 0         | 0         | 0         | 0         |
| Percilis |          |           |           |           |           |           |           |           |           |           |           |
| TV       | DisM     | 0         | 0         | 0         | 2.94 (10) | 0         |           |           |           |           |           |
| TV       | SOSh     | 39.98 (2) | 23.00 (3) | 37.86 (2) | 4.14 (8)  | 16.74 (2) |           |           |           |           |           |
| TV       | SOSSt    | 11.24 (3) | 6.02 (4)  | 0         | 9.56 (3)  | 9.11 (3)  |           |           |           |           |           |
| MV       | BAEr     | 0         | 0         | 0         | 8.66 (5)  | 3.58 (8)  | 0         | 0         | 0         | 0         | 4.56 (7)  |
| MV       | BAOt     | 0         | 0         | 0         | 2.22 (12) | 0         | 0         | 0         | 0         | 0         | 0         |
| MV       | BAWa     | 0         | 0         | 0         | 1.31 (14) | 1.14 (16) | 0         | 0         | 0         | 0         | 1.56 (10) |
| MV       | BFLW     | 0         | 0         | 0         | 4.44 (6)  | 4.62 (6)  | 0         | 0         | 0         | 0         | 6.04 (5)  |
| MV       | BFOt     | 0         | 0         | 0         | 0         | 0         | 0         | 0         | 0         | 0         | 0         |
| MV       | BPGr     | 0         | 0         | 0         | 0         | 0         | 0         | 0         | 0         | 0         | 0         |
| MV       | BPMa     | 0         | 0         | 0         | 0         | 0         | 0         | 0         | 0         | 0         | 0         |
| MV       | BPno     | 0         | 0         | 0         | 0         | 0         | 0         | 0         | 0         | 0         | 0         |
| MV       | BPRi     | 0         | 0         | 0         | 0         | 0         | 0         | 0         | 0         | 0         | 0         |
| MV       | BPWo     | 0         | 0         | 0         | 2.01 (13) | 0         | 0         | 0         | 0         | 0         | 0         |
| MV       | CBFO     | 0         | 0         | 0         | 0         | 3.85 (7)  | 0         | 0         | 0         | 0         | 8.32 (4)  |
| MV       | CBFR     | 0         | 0         | 0         | 0         | 1.89 (14) | 0         | 0         | 0         | 0         | 0         |
| MV       | CFIB     | 0         | 0         | 0         | 0         | 0         | 0         | 0         | 0         | 0         | 0         |
| MV       | CFLW     | 0         | 0         | 0         | 0         | 0.64 (17) | 0         | 0         | 0         | 0         | 0         |
| MV       | CFNa     | 0         | 0         | 0         | 0         | 0         | 0         | 0         | 0         | 0         | 0         |
| MV       | CFWi     | 0         | 0         | 0         | 0         | 0         | 0         | 0         | 0         | 0         | 0         |
| MV       | ChDe     | 0         | 29.70 (2) | 18.48 (3) | 13.83 (2) | 6.78 (4)  | 8.42 (4)  | 36.53 (2) | 23.22 (2) | 31.55 (2) | 10.44 (2) |
| MV       | ChDV     | 0         | 0         | 0         | 0         | 0         | 0         | 0         | 0         | 0         | 0         |
| MV       | ChWi     | 48.78 (1) | 41.28 (1) | 43.66 (1) | 31.09 (1) | 31.16 (1) | 46.72 (1) | 63.47 (1) | 76.78 (1) | 68.45 (1) | 46.20 (1) |
| MV       | ChWV     | 0         | 0         | 0         | 0         | 0         | 0         | 0         | 0         | 0         | 0         |
| MV       | CSFo     | 0         | 0         | 0         | 0         | 0         | 7.90 (6)  | 0         | 0         | 0         | 0         |
| MV       | FIDi     | 0         | 0         | 0         | 0         | 0         | 0         | 0         | 0         | 0         | 0         |
| MV       | FIVe     | 0         | 0         | 0         | 0         | 0         | 0         | 0         | 0         | 0         | 0         |

| Dataset  | Variable | incl. TV  |           |           |           |           | excl. TV  |           |           |           |           |
|----------|----------|-----------|-----------|-----------|-----------|-----------|-----------|-----------|-----------|-----------|-----------|
|          |          | 0         | 200       | 1000      | 2500      | 4000      | 0         | 200       | 1000      | 2500      | 4000      |
| MV       | InVe     | 0         | 0         | 0         | 0         | 0         | 0         | 0         | 0         | 0         | 0         |
| MV       | Plan     | 0         | 0         | 0         | 0         | 0         | 8.16 (5)  | 0         | 0         | 0         | 0         |
| MV       | RVRe     | 0         | 0         | 0         | 0         | 0         | 0         | 0         | 0         | 0         | 0         |
| MV       | RVSp     | 0         | 0         | 0         | 0         | 2.73 (10) | 0         | 0         | 0         | 0         | 0         |
| MV       | RVTF     | 0         | 0         | 0         | 0         | 2.05 (13) | 0         | 0         | 0         | 0         | 0         |
| MV       | SMaS     | 0         | 0         | 0         | 3.90 (9)  | 2.62 (11) | 0         | 0         | 0         | 0         | 5.39 (6)  |
| MV       | SuDi     | 0         | 0         | 0         | 8.82 (4)  | 6.56 (5)  | 10.23 (3) | 0         | 0         | 0         | 9.92 (3)  |
| MV       | SuHa     | 0         | 0         | 0         | 0         | 0         | 0         | 0         | 0         | 0         | 0         |
| MV       | SuMa     | 0         | 0         | 0         | 0         | 0         | 0         | 0         | 0         | 0         | 0         |
| MV       | SuSa     | 0         | 0         | 0         | 2.68 (11) | 1.42 (15) | 5.37 (7)  | 0         | 0         | 0         | 3.16 (9)  |
| MV       | SuSo     | 0         | 0         | 0         | 4.42 (7)  | 3.00 (9)  | 13.20 (2) | 0         | 0         | 0         | 4.42 (8)  |
| MV       | SuWo     | 0         | 0         | 0         | 0         | 2.11 (12) | 0         | 0         | 0         | 0         | 0         |
| Phoxinus |          |           |           |           |           |           |           |           |           |           |           |
| TV       | DisM     | 26.42 (1) | 20.17 (2) | 0         | 0         | 0         |           |           |           |           |           |
| TV       | SOSh     | 17.56 (2) | 10.93 (4) | 0         | 0         | 0         |           |           |           |           |           |
| TV       | SOSSt    | 1.80 (11) | 1.06 (14) | 0         | 0         | 0         |           |           |           |           |           |
| MV       | BAEr     | 0.05 (25) | 0         | 0         | 0         | 0         | 0.06 (23) | 0         | 0         | 0         | 0         |
| MV       | BAOt     | 0.00 (28) | 0         | 0         | 0         | 0         | 0.01 (24) | 0         | 0         | 0         | 0         |
| MV       | BAWa     | 0.32 (21) | 2.46 (11) | 0         | 0         | 0         | 0.55 (18) | 0         | 0         | 0         | 0         |
| MV       | BFLW     | 0.00 (32) | 0         | 0         | 0         | 0         | 0         | 0         | 0         | 0         | 0         |
| MV       | BFOt     | 0.00 (33) | 0         | 0         | 0         | 0         | 0         | 0         | 0         | 0         | 0         |
| MV       | BPGr     | 0         | 0         | 0         | 0         | 0         | 0         | 0         | 0         | 0         | 0         |
| MV       | BPMa     | 0         | 0         | 0         | 0         | 0         | 0         | 0         | 0         | 0         | 0         |
| MV       | BPno     | 0.11 (23) | 0.42 (15) | 0         | 0         | 0         | 0.28 (19) | 0         | 0         | 0         | 0         |
| MV       | BPRi     | 0         | 0         | 0         | 0         | 0         | 0         | 0         | 0         | 0         | 0         |
| MV       | BPWo     | 2.40 (9)  | 2.77 (10) | 0         | 0         | 0         | 5.48 (5)  | 0         | 0         | 0         | 0         |
| MV       | CBFO     | 0         | 0         | 0         | 0         | 0         | 0         | 0         | 0         | 0         | 0         |
| MV       | CBFR     | 0.40 (20) | 0.20 (16) | 0         | 0         | 0         | 0.58 (17) | 0         | 0         | 0         | 0         |
| MV       | CFIB     | 0.00 (30) | 0         | 0         | 0         | 0         | 0.00 (27) | 0         | 0         | 0         | 0         |
| MV       | CFLW     | 0.00 (29) | 0         | 0         | 0         | 0         | 0.00 (26) | 0         | 0         | 0         | 0         |
| MV       | CFNa     | 0.07 (24) | 0         | 0         | 0         | 0         | 0.17 (20) | 0         | 0         | 0         | 0         |
| MV       | CFWi     | 0.00 (31) | 0         | 0         | 0         | 0         | 0.00 (28) | 0         | 0         | 0         | 0         |
| MV       | ChDe     | 10.77 (3) | 13.84 (3) | 48.56 (2) | 38.52 (2) | 25.67 (2) | 15.00 (3) | 38.27 (2) | 40.07 (1) | 40.44 (2) | 25.02 (2) |
| MV       | ChDV     | 0.30 (22) | 0         | 0         | 0         | 0         | 0.15 (21) | 0         | 0         | 0         | 0         |
| MV       | ChWi     | 9.31 (5)  | 22.86 (1) | 51.44 (1) | 61.48 (1) | 44.16 (1) | 29.89 (1) | 61.73 (1) | 37.81 (2) | 59.56 (1) | 43.57 (1) |
| MV       | ChWV     | 0.97 (13) | 0         | 0         | 0         | 0         | 1.54 (13) | 0         | 0         | 0         | 0         |
| MV       | CSFo     | 0.92 (15) | 0         | 0         | 0         | 0         | 1.51 (14) | 0         | 0         | 0         | 0         |
| MV       | FIDi     | 0.00 (27) | 0         | 0         | 0         | 0         | 0.00 (25) | 0         | 0         | 0         | 0         |



| Dataset  | Variable | incl. TV  |           |           |           |           | excl. TV  |           |           |           |           |
|----------|----------|-----------|-----------|-----------|-----------|-----------|-----------|-----------|-----------|-----------|-----------|
|          |          | 0         | 200       | 1000      | 2500      | 4000      | 0         | 200       | 1000      | 2500      | 4000      |
| MV       | FlVe     | 10.74 (4) | 0         | 0         | 0         | 0         | 16.17 (2) | 0         | 0         | 0         | 0         |
| MV       | InVe     | 2.23 (10) | 0         | 0         | 0         | 0         | 2.89 (7)  | 0         | 0         | 0         | 0         |
| MV       | Plan     | 5.18 (6)  | 0         | 0         | 0         | 0         | 9.10 (4)  | 0         | 0         | 0         | 0         |
| MV       | RVRe     | 0         | 0         | 0         | 0         | 0         | 0         | 0         | 0         | 0         | 0         |
| MV       | RVSp     | 0.75 (17) | 0         | 0         | 0         | 0         | 2.17 (8)  | 0         | 0         | 0         | 0         |
| MV       | RVTF     | 0.02 (26) | 0         | 0         | 0         | 0         | 0.11 (22) | 0         | 0         | 0         | 0         |
| MV       | SMaS     | 0.51 (19) | 3.78 (9)  | 0         | 0         | 0         | 1.72 (12) | 0         | 0         | 0         | 0         |
| MV       | SuDi     | 2.62 (8)  | 3.79 (8)  | 0         | 0         | 4.68 (5)  | 5.02 (6)  | 0         | 0         | 0         | 4.65 (5)  |
| MV       | SuHa     | 0.85 (16) | 2.35 (12) | 0         | 0         | 0         | 1.20 (15) | 0         | 0         | 0         | 0         |
| MV       | SuMa     | 0.59 (18) | 4.59 (6)  | 0         | 0         | 0         | 0.78 (16) | 0         | 0         | 0         | 0         |
| MV       | SuSa     | 0.95 (14) | 1.64 (13) | 0         | 0         | 11.42 (4) | 2.09 (9)  | 0         | 22.11 (3) | 0         | 11.70 (4) |
| MV       | SuSo     | 1.05 (12) | 4.17 (7)  | 0         | 0         | 0         | 1.78 (10) | 0         | 0         | 0         | 0         |
| MV       | SuWo     | 3.12 (7)  | 4.97 (5)  | 0         | 0         | 14.07 (3) | 1.75 (11) | 0         | 0         | 0         | 15.06 (3) |
| Pungtius |          |           |           |           |           |           |           |           |           |           |           |
| TV       | DisM     | 30.41 (1) | 0         | 0         | 0         | 0         |           |           |           |           |           |
| TV       | SOSh     | 0         | 0         | 0         | 0         | 0         |           |           |           |           |           |
| TV       | SOST     | 0         | 0         | 0         | 0         | 0         |           |           |           |           |           |
| MV       | BAEr     | 0         | 0         | 0         | 0         | 29.96 (2) | 0         | 0         | 0         | 0         | 27.81 (2) |
| MV       | BAOt     | 0         | 0         | 0         | 0         | 0         | 0         | 0         | 0         | 0         | 0         |
| MV       | BAWa     | 0         | 0         | 0         | 0         | 0         | 0         | 0         | 0         | 0         | 0         |
| MV       | BFLW     | 0         | 0         | 0         | 0         | 0         | 0         | 0         | 0         | 0         | 0         |
| MV       | BFOt     | 0         | 0         | 0         | 0         | 0         | 0         | 0         | 0         | 0         | 0         |
| MV       | BPGr     | 0         | 0         | 0         | 0         | 0         | 0         | 0         | 0         | 0         | 0         |
| MV       | BPMa     | 0         | 0         | 0         | 0         | 0         | 0         | 0         | 0         | 0         | 0         |
| MV       | BPno     | 0         | 0         | 0         | 0         | 0         | 0         | 0         | 0         | 0         | 0         |
| MV       | BPRi     | 0         | 0         | 0         | 0         | 0         | 0         | 0         | 0         | 0         | 0         |
| MV       | BPWo     | 0         | 0         | 0         | 0         | 0         | 0         | 0         | 0         | 0         | 0         |
| MV       | CBFO     | 0         | 0         | 0         | 0         | 0         | 0         | 0         | 0         | 0         | 0         |
| MV       | CBFR     | 0         | 0         | 24.38 (3) | 24.21 (3) | 0         | 0         | 0         | 19.60 (2) | 30.01 (2) | 0         |
| MV       | CFIB     | 0         | 0         | 0         | 0         | 0         | 0         | 0         | 0         | 0         | 0         |
| MV       | CFLW     | 0         | 0         | 0         | 0         | 0         | 0         | 0         | 0         | 0         | 0         |
| MV       | CFNa     | 0         | 0         | 0         | 0         | 0         | 0         | 0         | 0         | 0         | 0         |
| MV       | CFWi     | 0         | 0         | 0         | 0         | 0         | 0         | 0         | 0         | 0         | 0         |
| MV       | ChDe     | 0         | 0         | 0         | 0         | 0         | 0         | 0         | 10.02 (5) | 0         | 0         |
| MV       | ChDV     | 0         | 0         | 0         | 0         | 0         | 0         | 0         | 0         | 0         | 0         |
| MV       | ChWi     | 12.98 (5) | 48.65 (2) | 16.56 (4) | 0         | 0         | 21.15 (4) | 31.01 (1) | 9.43 (6)  | 0         | 0         |
| MV       | ChWV     | 0         | 0         | 0         | 0         | 0         | 0         | 0         | 0         | 0         | 0         |
| MV       | CSFo     | 22.95 (2) | 0         | 0         | 0         | 0         | 28.49 (1) | 0         | 0         | 0         | 0         |

| Dataset | Variable | incl. TV  |           |           |           |           | excl. TV  |           |           |           |           |
|---------|----------|-----------|-----------|-----------|-----------|-----------|-----------|-----------|-----------|-----------|-----------|
|         |          | 0         | 200       | 1000      | 2500      | 4000      | 0         | 200       | 1000      | 2500      | 4000      |
| MV      | FLDi     | 0         | 0         | 0         | 0         | 0         | 0         | 0         | 0         | 0         | 0         |
| MV      | FLVe     | 0         | 0         | 0         | 0         | 0         | 0         | 0         | 0         | 0         | 0         |
| MV      | InVe     | 0         | 0         | 0         | 0         | 0         | 0         | 0         | 0         | 0         | 0         |
| MV      | Plan     | 19.81 (3) | 0         | 0         | 0         | 0         | 26.18 (2) | 0         | 0         | 0         | 0         |
| MV      | RVRe     | 0         | 0         | 0         | 0         | 0         | 0         | 0         | 0         | 0         | 0         |
| MV      | RVSp     | 0         | 0         | 0         | 0         | 0         | 0         | 0         | 0         | 0         | 0         |
| MV      | RVTF     | 0         | 0         | 0         | 0         | 0         | 0         | 0         | 0         | 0         | 0         |
| MV      | SMaS     | 0         | 0         | 0         | 0         | 0         | 0         | 0         | 0         | 0         | 0         |
| MV      | SuDi     | 0         | 0         | 0         | 0         | 0         | 0         | 20.27 (3) | 0         | 0         | 0         |
| MV      | SuHa     | 0         | 0         | 0         | 0         | 0         | 0         | 0         | 0         | 0         | 0         |
| MV      | SuMa     | 0         | 0         | 0         | 0         | 0         | 0         | 19.69 (4) | 13.76 (4) | 0         | 0         |
| MV      | SuSa     | 13.86 (4) | 51.35 (1) | 25.66 (2) | 47.17 (1) | 70.04 (1) | 24.18 (3) | 29.03 (2) | 18.73 (3) | 69.99 (1) | 72.19 (1) |
| MV      | SuSo     | 0         | 0         | 0         | 0         | 0         | 0         | 0         | 0         | 0         | 0         |
| MV      | SuWo     | 0         | 0         | 33.41 (1) | 28.61 (2) | 0         | 0         | 0         | 28.46 (1) | 0         | 0         |
| Rutilus |          |           |           |           |           |           |           |           |           |           |           |
| TV      | DisM     | 0         | 0         | 0         | 0         | 0         |           |           |           |           |           |
| TV      | SOSh     | 40.12 (2) | 14.42 (4) | 0         | 0         | 0         |           |           |           |           |           |
| TV      | SOSSt    | 59.88 (1) | 32.65 (1) | 49.12 (2) | 26.70 (2) | 29.76 (1) |           |           |           |           |           |
| MV      | BAEr     | 0         | 0         | 0         | 0         | 0         | 0         | 0         | 0         | 0         | 0         |
| MV      | BAOt     | 0         | 0         | 0         | 0         | 0         | 0         | 0         | 0         | 0         | 0         |
| MV      | BAWa     | 0         | 0         | 0         | 0         | 8.42 (5)  | 0         | 0         | 0         | 0         | 0         |
| MV      | BFLW     | 0         | 0         | 0         | 0         | 4.67 (9)  | 0         | 0         | 0         | 0         | 0         |
| MV      | BFOt     | 0         | 0         | 0         | 0         | 0         | 0         | 0         | 0         | 0         | 0         |
| MV      | BPGr     | 0         | 0         | 0         | 0         | 0         | 0         | 0         | 0         | 0         | 0         |
| MV      | BPMa     | 0         | 0         | 0         | 0         | 0         | 0         | 0         | 0         | 0         | 0         |
| MV      | BPno     | 0         | 0         | 0         | 25.46 (3) | 8.51 (4)  | 0         | 0         | 0         | 28.32 (3) | 0         |
| MV      | BPRi     | 0         | 0         | 0         | 0         | 0         | 0         | 0         | 0         | 0         | 0         |
| MV      | BPWo     | 0         | 0         | 0         | 0         | 4.98 (8)  | 0         | 0         | 0         | 0         | 0         |
| MV      | CBFO     | 0         | 0         | 0         | 0         | 14.41 (2) | 0         | 0         | 0         | 0         | 0         |
| MV      | CBFR     | 0         | 0         | 0         | 0         | 0         | 0         | 0         | 0         | 0         | 0         |
| MV      | CFIB     | 0         | 0         | 0         | 0         | 0         | 0         | 0         | 0         | 0         | 0         |
| MV      | CFLW     | 0         | 0         | 0         | 0         | 0         | 0         | 0         | 0         | 0         | 0         |
| MV      | CFNa     | 0         | 0         | 0         | 0         | 4.66 (10) | 0         | 0         | 0         | 0         | 0         |
| MV      | CFWi     | 0         | 0         | 0         | 0         | 0         | 0         | 0         | 0         | 0         | 0         |
| MV      | ChDe     | 0         | 0         | 0         | 0         | 0         | 0         | 0         | 0         | 0         | 0         |
| MV      | ChDV     | 0         | 0         | 0         | 0         | 0         | 0         | 0         | 0         | 0         | 0         |
| MV      | ChWi     | 0         | 20.48 (3) | 50.88 (1) | 11.09 (4) | 5.38 (7)  | 50.15 (1) | 62.21 (1) | 57.58 (1) | 30.14 (2) | 50.83 (1) |
| MV      | ChWV     | 0         | 0         | 0         | 0         | 0         | 0         | 0         | 0         | 0         | 0         |

| Dataset  | Variable | incl. TV  |           |           |           |           | excl. TV  |           |           |           |           |
|----------|----------|-----------|-----------|-----------|-----------|-----------|-----------|-----------|-----------|-----------|-----------|
|          |          | 0         | 200       | 1000      | 2500      | 4000      | 0         | 200       | 1000      | 2500      | 4000      |
| MV       | CSFo     | 0         | 0         | 0         | 0         | 0         | 0         | 0         | 0         | 0         | 0         |
| MV       | FDi      | 0         | 0         | 0         | 0         | 0         | 0         | 0         | 0         | 0         | 0         |
| MV       | FlVe     | 0         | 0         | 0         | 0         | 0         | 0         | 0         | 0         | 0         | 0         |
| MV       | InVe     | 0         | 0         | 0         | 0         | 0         | 0         | 0         | 0         | 0         | 0         |
| MV       | Plan     | 0         | 0         | 0         | 0         | 0         | 0         | 0         | 0         | 0         | 0         |
| MV       | RVRe     | 0         | 0         | 0         | 0         | 0         | 0         | 0         | 0         | 0         | 0         |
| MV       | RVSp     | 0         | 0         | 0         | 0         | 5.56 (6)  | 0         | 0         | 0         | 0         | 0         |
| MV       | RVTF     | 0         | 0         | 0         | 0         | 0         | 0         | 0         | 0         | 0         | 0         |
| MV       | SMaS     | 0         | 0         | 0         | 36.75 (1) | 9.33 (3)  | 0         | 0         | 42.42 (2) | 41.54 (1) | 49.17 (2) |
| MV       | SuDi     | 0         | 0         | 0         | 0         | 0         | 29.54 (2) | 0         | 0         | 0         | 0         |
| MV       | SuHa     | 0         | 0         | 0         | 0         | 0         | 0         | 0         | 0         | 0         | 0         |
| MV       | SuMa     | 0         | 0         | 0         | 0         | 0         | 0         | 0         | 0         | 0         | 0         |
| MV       | SuSa     | 0         | 0         | 0         | 0         | 0         | 0         | 0         | 0         | 0         | 0         |
| MV       | SuSo     | 0         | 32.45 (2) | 0         | 0         | 0         | 20.31 (3) | 37.79 (2) | 0         | 0         | 0         |
| MV       | SuWo     | 0         | 0         | 0         | 0         | 4.32 (11) | 0         | 0         | 0         | 0         | 0         |
| Salmalar |          |           |           |           |           |           |           |           |           |           |           |
| TV       | DisM     | 0         | 0         | 0         | 0         | 0         |           |           |           |           |           |
| TV       | SOSh     | 63.18 (1) | 56.49 (1) | 71.99 (1) | 62.70 (1) | 44.73 (2) |           |           |           |           |           |
| TV       | SOSSt    | 0         | 0         | 0         | 0         | 0         |           |           |           |           |           |
| MV       | BAEr     | 0         | 0         | 0         | 0         | 0         | 0         | 0         | 0         | 2.69 (9)  | 0         |
| MV       | BAOt     | 0         | 0         | 0         | 0         | 0         | 0         | 0         | 0.99 (12) | 0.58 (19) | 0         |
| MV       | BAWa     | 0         | 0         | 0         | 0         | 0         | 0         | 0         | 0         | 1.45 (12) | 0         |
| MV       | BFLW     | 0         | 0         | 0         | 0         | 0         | 0         | 0         | 1.79 (11) | 4.37 (6)  | 14.06 (3) |
| MV       | BFOt     | 0         | 0         | 0         | 37.30 (2) | 55.27 (1) | 0         | 0         | 0         | 20.95 (1) | 38.30 (1) |
| MV       | BPGGr    | 0         | 0         | 0         | 0         | 0         | 0         | 0         | 0         | 0         | 0         |
| MV       | BPMa     | 0         | 0         | 0         | 0         | 0         | 0         | 0         | 0         | 0         | 0         |
| MV       | BPno     | 0         | 0         | 0         | 0         | 0         | 0         | 0         | 14.84 (3) | 0.73 (17) | 0         |
| MV       | BPRi     | 0         | 0         | 0         | 0         | 0         | 0         | 0         | 0         | 0         | 0         |
| MV       | BPWo     | 0         | 0         | 0         | 0         | 0         | 0         | 0         | 0         | 0.19 (24) | 0         |
| MV       | CBFO     | 0         | 0         | 0         | 0         | 0         | 0         | 0         | 0         | 0.43 (21) | 0         |
| MV       | CBFR     | 17.04 (2) | 23.19 (2) | 28.01 (2) | 0         | 0         | 16.02 (3) | 34.75 (2) | 15.88 (2) | 10.25 (4) | 12.83 (4) |
| MV       | CFIB     | 0         | 0         | 0         | 0         | 0         | 0         | 0         | 4.89 (7)  | 9.44 (5)  | 10.07 (5) |
| MV       | CFLW     | 0         | 0         | 0         | 0         | 0         | 0         | 0         | 0         | 0         | 0         |
| MV       | CFNa     | 0         | 0         | 0         | 0         | 0         | 0         | 0         | 0         | 0.24 (23) | 0         |
| MV       | CFWi     | 0         | 0         | 0         | 0         | 0         | 0         | 0         | 0         | 0.19 (25) | 0         |
| MV       | ChDe     | 0         | 0         | 0         | 0         | 0         | 2.77 (6)  | 7.42 (4)  | 6.72 (6)  | 1.99 (10) | 0         |
| MV       | ChDV     | 0         | 0         | 0         | 0         | 0         | 0         | 0         | 0         | 0.02 (27) | 0         |
| MV       | ChWi     | 2.12 (6)  | 2.79 (4)  | 0         | 0         | 0         | 38.52 (1) | 35.16 (1) | 27.97 (1) | 20.21 (2) | 24.74 (2) |

| Dataset  | Variable | incl. TV  |           |           |           |           | excl. TV  |           |           |           |           |
|----------|----------|-----------|-----------|-----------|-----------|-----------|-----------|-----------|-----------|-----------|-----------|
|          |          | 0         | 200       | 1000      | 2500      | 4000      | 0         | 200       | 1000      | 2500      | 4000      |
| MV       | ChWV     | 0         | 0         | 0         | 0         | 0         | 0         | 0         | 0         | 0.00 (28) | 0         |
| MV       | CSFo     | 5.38 (4)  | 0         | 0         | 0         | 0         | 22.22 (2) | 0         | 0         | 11.77 (3) | 0         |
| MV       | FDi      | 0         | 0         | 0         | 0         | 0         | 0         | 0         | 0         | 0         | 0         |
| MV       | FlVe     | 0         | 0         | 0         | 0         | 0         | 0         | 0         | 0         | 0.34 (22) | 0         |
| MV       | InVe     | 0         | 0         | 0         | 0         | 0         | 0         | 0         | 0         | 0         | 0         |
| MV       | Plan     | 2.85 (5)  | 0         | 0         | 0         | 0         | 6.80 (5)  | 0         | 0         | 0.06 (26) | 0         |
| MV       | RVRe     | 0         | 0         | 0         | 0         | 0         | 0         | 0         | 0         | 0         | 0         |
| MV       | RVSp     | 0         | 0         | 0         | 0         | 0         | 0         | 0         | 0         | 0.90 (14) | 0         |
| MV       | RVTF     | 0         | 0         | 0         | 0         | 0         | 0         | 0         | 0         | 0.86 (15) | 0         |
| MV       | SMaS     | 0         | 0         | 0         | 0         | 0         | 0         | 0         | 7.50 (5)  | 3.62 (8)  | 0         |
| MV       | SuDi     | 0         | 0         | 0         | 0         | 0         | 0         | 0         | 4.29 (8)  | 0.68 (18) | 0         |
| MV       | SuHa     | 0         | 0         | 0         | 0         | 0         | 0         | 0         | 0         | 1.37 (13) | 0         |
| MV       | SuMa     | 0         | 0         | 0         | 0         | 0         | 0         | 0         | 3.62 (9)  | 0.49 (20) | 0         |
| MV       | SuSa     | 9.43 (3)  | 17.53 (3) | 0         | 0         | 0         | 13.67 (4) | 22.67 (3) | 9.51 (4)  | 3.75 (7)  | 0         |
| MV       | SuSo     | 0         | 0         | 0         | 0         | 0         | 0         | 0         | 2.01 (10) | 1.66 (11) | 0         |
| MV       | SuWo     | 0         | 0         | 0         | 0         | 0         | 0         | 0         | 0         | 0.76 (16) | 0         |
| Salmario |          |           |           |           |           |           |           |           |           |           |           |
| TV       | DisM     | 45.63 (1) | 28.72 (1) | 20.87 (2) | 25.82 (1) | 16.75 (1) |           |           |           |           |           |
| TV       | SOSh     | 0         | 0         | 0         | 0         | 0         |           |           |           |           |           |
| TV       | SOSSt    | 0         | 0.05 (16) | 0         | 0         | 0         |           |           |           |           |           |
| MV       | BAEr     | 0         | 0.64 (12) | 1.73 (9)  | 0         | 6.77 (7)  | 0         | 1.36 (12) | 0         | 0         | 8.46 (6)  |
| MV       | BAOt     | 0         | 0         | 0         | 0         | 3.03 (13) | 0         | 0         | 0         | 2.51 (10) | 3.75 (12) |
| MV       | BAWa     | 0         | 0         | 0         | 0         | 2.63 (14) | 0         | 0         | 0         | 1.40 (12) | 3.57 (13) |
| MV       | BFLW     | 0         | 0         | 0         | 0         | 5.96 (8)  | 0         | 0         | 0         | 2.12 (11) | 9.69 (4)  |
| MV       | BFOt     | 0         | 0         | 0         | 4.62 (8)  | 8.15 (5)  | 0         | 0         | 0         | 4.19 (8)  | 8.33 (7)  |
| MV       | BPGr     | 0         | 0         | 0         | 0         | 0         | 0         | 0         | 0         | 0         | 0         |
| MV       | BPMa     | 0         | 0         | 0         | 0         | 0         | 0         | 0         | 0         | 0         | 0         |
| MV       | BPno     | 0         | 0.15 (14) | 0         | 0         | 0         | 0         | 0         | 0         | 0         | 0         |
| MV       | BPRi     | 0         | 0         | 0         | 0         | 3.64 (11) | 0         | 0         | 0         | 0         | 5.94 (8)  |
| MV       | BPWo     | 0         | 0         | 0         | 0         | 0         | 0         | 0.97 (13) | 0         | 0         | 0         |
| MV       | CBFO     | 0         | 0         | 0         | 0         | 8.76 (4)  | 0         | 0         | 0         | 0         | 9.41 (5)  |
| MV       | CBFR     | 0         | 5.13 (7)  | 0         | 5.95 (7)  | 0         | 0         | 7.61 (7)  | 0         | 10.07 (5) | 0         |
| MV       | CFIB     | 0         | 0         | 0         | 0         | 0         | 0         | 0         | 0         | 0         | 0         |
| MV       | CFLW     | 0         | 0         | 0         | 0         | 0         | 0         | 0         | 0         | 0         | 0         |
| MV       | CFNa     | 0         | 0         | 7.97 (7)  | 8.35 (6)  | 4.61 (9)  | 0         | 0         | 0         | 7.24 (6)  | 4.59 (10) |
| MV       | CFWi     | 0         | 0         | 0         | 0         | 0         | 0         | 0         | 0         | 0         | 0         |
| MV       | ChDe     | 0         | 2.62 (10) | 1.41 (10) | 3.22 (10) | 0         | 0         | 4.68 (9)  | 0         | 4.21 (7)  | 0         |
| MV       | ChDV     | 0         | 0         | 0         | 0         | 0         | 0         | 0         | 0         | 0         | 0         |

| Dataset  | Variable | incl. TV  |           |           |           |           | excl. TV  |           |           |           |           |
|----------|----------|-----------|-----------|-----------|-----------|-----------|-----------|-----------|-----------|-----------|-----------|
|          |          | 0         | 200       | 1000      | 2500      | 4000      | 0         | 200       | 1000      | 2500      | 4000      |
| MV       | ChWi     | 24.96 (2) | 17.20 (2) | 15.85 (3) | 12.41 (3) | 13.57 (2) | 40.87 (1) | 21.25 (1) | 25.93 (2) | 17.05 (2) | 12.67 (2) |
| MV       | ChWV     | 0         | 0         | 0         | 0         | 0         | 0         | 0         | 0         | 0         | 0         |
| MV       | CSFo     | 0         | 0         | 0         | 0         | 0         | 0         | 0         | 0         | 0         | 0         |
| MV       | FLDi     | 0         | 0         | 0         | 0         | 0         | 0         | 0         | 0         | 0         | 0         |
| MV       | FLVe     | 0         | 0         | 0         | 0         | 0         | 0         | 0         | 0         | 0         | 0         |
| MV       | InVe     | 0         | 0         | 0         | 0         | 0         | 0         | 0         | 0         | 0         | 0         |
| MV       | Plan     | 0         | 0         | 0         | 0         | 0         | 0         | 0         | 0         | 0         | 0         |
| MV       | RVRe     | 0         | 0         | 0         | 0         | 0         | 0         | 0         | 0         | 0         | 0         |
| MV       | RVSp     | 0         | 0.47 (13) | 8.87 (5)  | 0         | 0         | 0         | 2.38 (10) | 0         | 0         | 0         |
| MV       | RVTF     | 0         | 0.12 (15) | 0         | 0         | 0         | 0         | 0         | 0         | 0         | 0         |
| MV       | SMaS     | 0         | 1.06 (11) | 0         | 0         | 0         | 0         | 1.46 (11) | 0         | 0         | 0         |
| MV       | SuDi     | 18.41 (3) | 6.42 (6)  | 1.31 (11) | 0         | 7.44 (6)  | 19.45 (3) | 9.74 (4)  | 0         | 1.06 (13) | 10.30 (3) |
| MV       | SuHa     | 0         | 3.36 (9)  | 0         | 0         | 0         | 0         | 4.86 (8)  | 0         | 0         | 0         |
| MV       | SuMa     | 0         | 4.44 (8)  | 9.11 (4)  | 3.80 (9)  | 0         | 8.09 (5)  | 8.19 (6)  | 24.02 (3) | 3.40 (9)  | 0         |
| MV       | SuSa     | 0         | 6.58 (5)  | 8.47 (6)  | 9.77 (5)  | 11.65 (3) | 8.22 (4)  | 10.96 (3) | 16.72 (4) | 11.37 (4) | 13.86 (1) |
| MV       | SuSo     | 11.00 (4) | 14.65 (3) | 21.22 (1) | 14.83 (2) | 3.81 (10) | 23.37 (2) | 17.10 (2) | 33.33 (1) | 22.33 (1) | 5.29 (9)  |
| MV       | SuWo     | 0         | 8.39 (4)  | 3.19 (8)  | 11.22 (4) | 3.23 (12) | 0         | 9.44 (5)  | 0         | 13.05 (3) | 4.13 (11) |
| Tincinca |          |           |           |           |           |           |           |           |           |           |           |
| TV       | DisM     | 23.77 (2) | 0         | 8.86 (3)  | 16.26 (3) | 0         |           |           |           |           |           |
| TV       | SOSh     | 0         | 0         | 0.20 (21) | 0         | 0         |           |           |           |           |           |
| TV       | SOSSt    | 0         | 0         | 0.00 (23) | 0         | 0         |           |           |           |           |           |
| MV       | BAEr     | 0         | 0         | 2.64 (10) | 0         | 0         | 0         | 0         | 2.69 (10) | 0         | 0         |
| MV       | BAOt     | 0         | 0         | 42.38 (1) | 17.35 (2) | 48.28 (2) | 0         | 0         | 49.24 (1) | 0         | 48.34 (2) |
| MV       | BAWa     | 0         | 0         | 1.39 (14) | 0         | 0         | 0         | 0         | 1.27 (15) | 0         | 0         |
| MV       | BFLW     | 0         | 0         | 0.72 (19) | 0         | 0         | 0         | 0         | 0.96 (17) | 0         | 0         |
| MV       | BFOt     | 0         | 0         | 2.52 (11) | 0         | 0         | 0         | 0         | 2.25 (12) | 0         | 0         |
| MV       | BPGr     | 0         | 0         | 0         | 0         | 0         | 0         | 0         | 0         | 0         | 0         |
| MV       | BPMa     | 0         | 0         | 0         | 0         | 0         | 0         | 0         | 0         | 0         | 0         |
| MV       | BPno     | 0         | 0         | 0.85 (18) | 0         | 0         | 0         | 0         | 0         | 0         | 0         |
| MV       | BPRi     | 0         | 0         | 0         | 0         | 0         | 0         | 0         | 0         | 0         | 0         |
| MV       | BPWo     | 0         | 0         | 0.05 (22) | 0         | 0         | 0         | 0         | 0         | 0         | 0         |
| MV       | CBFO     | 0         | 0         | 0         | 0         | 0         | 0         | 0         | 0         | 0         | 0         |
| MV       | CBFR     | 0         | 0         | 1.06 (16) | 0         | 0         | 0         | 0         | 0         | 0         | 0         |
| MV       | CFIB     | 0         | 0         | 1.80 (13) | 0         | 0         | 0         | 0         | 2.52 (11) | 0         | 0         |
| MV       | CFLW     | 0         | 0         | 0         | 0         | 0         | 0         | 0         | 0         | 0         | 0         |
| MV       | CFNa     | 0         | 0         | 0         | 6.35 (6)  | 0         | 0         | 0         | 0         | 0         | 0         |
| MV       | CFWi     | 0         | 0         | 0         | 0         | 0         | 0         | 0         | 0         | 0         | 0         |
| MV       | ChDe     | 0         | 0         | 5.65 (4)  | 0         | 0         | 0         | 0         | 7.37 (2)  | 0         | 0         |

| Dataset | Variable | incl. TV  |           |           |           |           | excl. TV  |           |           |      |           |
|---------|----------|-----------|-----------|-----------|-----------|-----------|-----------|-----------|-----------|------|-----------|
|         |          | 0         | 200       | 1000      | 2500      | 4000      | 0         | 200       | 1000      | 2500 | 4000      |
| MV      | ChDV     | 0         | 0         | 0         | 0         | 0         | 0         | 0         | 0         | 0    | 0         |
| MV      | ChWi     | 3.87 (6)  | 0         | 3.44 (6)  | 0         | 0         | 0         | 0         | 3.75 (6)  | 0    | 0         |
| MV      | ChWV     | 0         | 0         | 0         | 0         | 0         | 0         | 0         | 0         | 0    | 0         |
| MV      | CSFo     | 10.39 (4) | 0         | 0         | 0         | 0         | 19.96 (3) | 0         | 0         | 0    | 0         |
| MV      | FLDi     | 0         | 0         | 0         | 0         | 0         | 0         | 0         | 0         | 0    | 0         |
| MV      | FLVe     | 0         | 0         | 0         | 0         | 0         | 0         | 0         | 0         | 0    | 0         |
| MV      | InVe     | 0         | 0         | 0         | 0         | 0         | 0         | 0         | 0         | 0    | 0         |
| MV      | Plan     | 9.62 (5)  | 0         | 0         | 0         | 0         | 13.95 (4) | 0         | 0         | 0    | 0         |
| MV      | RVRe     | 0         | 0         | 0         | 0         | 0         | 0         | 0         | 0         | 0    | 0         |
| MV      | RVSp     | 0         | 0         | 0.68 (20) | 0         | 0         | 0         | 0         | 1.30 (14) | 0    | 0         |
| MV      | RVTF     | 0         | 0         | 3.40 (7)  | 34.64 (1) | 0         | 0         | 0         | 3.18 (7)  | 0    | 0         |
| MV      | SMaS     | 0         | 0         | 1.01 (17) | 0         | 0         | 0         | 0         | 1.18 (16) | 0    | 0         |
| MV      | SuDi     | 0         | 0         | 2.32 (12) | 0         | 0         | 0         | 0         | 2.78 (9)  | 0    | 0         |
| MV      | SuHa     | 0         | 0         | 2.94 (9)  | 0         | 0         | 0         | 0         | 3.14 (8)  | 0    | 0         |
| MV      | SuMa     | 0         | 0         | 3.30 (8)  | 15.08 (4) | 51.72 (1) | 0         | 0         | 3.97 (5)  | 0    | 51.66 (1) |
| MV      | SuSa     | 20.51 (3) | 51.57 (1) | 4.05 (5)  | 0         | 0         | 29.44 (2) | 52.14 (1) | 5.73 (4)  | 0    | 0         |
| MV      | SuSo     | 31.84 (1) | 48.43 (2) | 9.49 (2)  | 10.32 (5) | 0         | 36.65 (1) | 47.86 (2) | 7.32 (3)  | 0    | 0         |
| MV      | SuWo     | 0         | 0         | 1.25 (15) | 0         | 0         | 0         | 0         | 1.35 (13) | 0    | 0         |
