# Supplementary material for: Spatial Scaling of Environmental Variables Improves Species-Habitat Models of Fishes in a Small, Sand-Bed Lowland River
Source: PubMed Central journal article supplement (PMC4646645; doi:10.1371/journal.pone.0142813), 2015-11-16
Supplement: pone.0142813.s003.pdf [file pone.0142813.s003.pdf]

**S2 Table. Relative contribution of each predictor across five focal distance classes using assessed hydromorphological variables (AV) and with/without topological variables (TV).** Descriptive information about predictor variables and corresponding values are provided in Table 2. Relative contribution (%) measured as the number of times a variable is used for splitting, weighted by the squared improvement at each split and averaged over all trees (Elith et al., 2008). Values in parenthesis indicate importance rank of each variable.

| Dataset  | Variable | incl. TV  |           |           |           |           | excl. TV  |           |           |           |           |
|----------|----------|-----------|-----------|-----------|-----------|-----------|-----------|-----------|-----------|-----------|-----------|
|          |          | 0         | 200       | 1000      | 2500      | 4000      | 0         | 200       | 1000      | 2500      | 4000      |
| Anguilla |          |           |           |           |           |           |           |           |           |           |           |
| TV       | DisM     | 18.93 (2) | 9.58 (4)  | 0         | 0         | 13.50 (3) |           |           |           |           |           |
| TV       | SOSh     | 0         | 0         | 0         | 0         | 0         |           |           |           |           |           |
| TV       | SOSSt    | 19.18 (1) | 12.67 (2) | 26.99 (2) | 0         | 0         |           |           |           |           |           |
| AV       | FU-BaP   | 0         | 0         | 0         | 0         | 3.01 (8)  | 0         | 0         | 0         | 0         | 0         |
| AV       | FU-BeF   | 0         | 0         | 0         | 0         | 0         | 0         | 0         | 0         | 0         | 0         |
| AV       | FU-BFe   | 0         | 0         | 0         | 0         | 0         | 0         | 0         | 0         | 0         | 0         |
| AV       | FU-ChD   | 2.91 (10) | 2.77 (10) | 0         | 0         | 0.91 (10) | 4.48 (8)  | 5.87 (9)  | 0         | 0         | 0         |
| AV       | FU-CSD   | 0         | 0         | 0         | 27.75 (3) | 38.39 (1) | 3.34 (9)  | 6.33 (8)  | 29.69 (2) | 39.53 (2) | 64.70 (1) |
| AV       | FU-CSF   | 18.37 (3) | 7.00 (6)  | 0         | 0         | 4.48 (6)  | 18.69 (3) | 7.74 (6)  | 0         | 0         | 0         |
| AV       | FU-CSW   | 3.56 (8)  | 5.33 (8)  | 0         | 42.79 (1) | 19.20 (2) | 11.29 (4) | 9.36 (4)  | 0         | 60.47 (1) | 35.30 (2) |
| AV       | FU-FPl   | 10.45 (5) | 31.65 (1) | 73.01 (1) | 29.46 (2) | 2.82 (9)  | 23.00 (1) | 32.54 (1) | 70.31 (1) | 0         | 0         |
| AV       | FU-LPr   | 0         | 0         | 0         | 0         | 6.69 (5)  | 0         | 0         | 0         | 0         | 0         |
| AV       | FU-Pla   | 13.16 (4) | 4.96 (9)  | 0         | 0         | 0         | 19.76 (2) | 9.34 (5)  | 0         | 0         | 0         |
| AV       | FU-RBS   | 3.09 (9)  | 10.67 (3) | 0         | 0         | 7.82 (4)  | 5.30 (7)  | 11.94 (2) | 0         | 0         | 0         |
| AV       | FU-RVe   | 5.73 (6)  | 8.54 (5)  | 0         | 0         | 0         | 8.48 (5)  | 9.79 (3)  | 0         | 0         | 0         |
| AV       | FU-Sub   | 4.61 (7)  | 6.83 (7)  | 0         | 0         | 3.17 (7)  | 5.66 (6)  | 7.08 (7)  | 0         | 0         | 0         |
| Cobienia |          |           |           |           |           |           |           |           |           |           |           |
| TV       | DisM     | 31.04 (1) | 0         | 0         | 0         | 0         |           |           |           |           |           |
| TV       | SOSh     | 18.11 (2) | 25.00 (2) | 0         | 0         | 0         |           |           |           |           |           |
| TV       | SOSSt    | 8.56 (6)  | 22.40 (3) | 8.90 (4)  | 15.94 (4) | 14.09 (4) |           |           |           |           |           |
| AV       | FU-BaP   | 0         | 0         | 0         | 0         | 0         | 0         | 0         | 0         | 9.97 (5)  | 0         |
| AV       | FU-BeF   | 0         | 0         | 0         | 0         | 0         | 0         | 0         | 0         | 0         | 0         |
| AV       | FU-BFe   | 0         | 0         | 25.50 (3) | 0         | 0         | 0         | 0         | 26.83 (3) | 0         | 0         |
| AV       | FU-ChD   | 0         | 0         | 0         | 0         | 0         | 0         | 0         | 0         | 0         | 0         |
| AV       | FU-CSD   | 0         | 0         | 31.69 (2) | 20.72 (3) | 28.32 (2) | 32.81 (2) | 48.87 (2) | 40.41 (1) | 29.04 (1) | 40.48 (1) |
| AV       | FU-CSF   | 0         | 0         | 0         | 0         | 0         | 0         | 0         | 0         | 10.96 (4) | 0         |
| AV       | FU-CSW   | 0         | 0         | 0         | 29.88 (2) | 34.10 (1) | 0         | 0         | 0         | 18.38 (3) | 33.66 (2) |
| AV       | FU-FPl   | 0         | 0         | 0         | 0         | 0         | 0         | 0         | 0         | 0         | 0         |
| AV       | FU-LPr   | 0         | 0         | 0         | 0         | 0         | 0         | 0         | 0         | 6.32 (6)  | 0         |
| AV       | FU-Pla   | 10.59 (5) | 0         | 0         | 0         | 0         | 0         | 0         | 0         | 0         | 0         |
| AV       | FU-RBS   | 0         | 0         | 0         | 0         | 0         | 0         | 0         | 0         | 0         | 0         |
| AV       | FU-RVe   | 16.55 (3) | 0         | 0         | 0         | 0         | 37.66 (1) | 0         | 0         | 0         | 0         |

| Dataset  | Variable | incl. TV  |           |           |           |           | excl. TV  |           |           |           |           |
|----------|----------|-----------|-----------|-----------|-----------|-----------|-----------|-----------|-----------|-----------|-----------|
|          |          | 0         | 200       | 1000      | 2500      | 4000      | 0         | 200       | 1000      | 2500      | 4000      |
| AV       | FU-Sub   | 15.16 (4) | 52.60 (1) | 33.90 (1) | 33.46 (1) | 23.48 (3) | 29.53 (3) | 51.13 (1) | 32.76 (2) | 25.33 (2) | 25.86 (3) |
| Gastatus |          |           |           |           |           |           |           |           |           |           |           |
| TV       | DisM     | 68.66 (1) | 36.24 (2) | 0         | 0         | 0         |           |           |           |           |           |
| TV       | SOSh     | 0         | 0         | 0         | 0         | 0         |           |           |           |           |           |
| TV       | SOSSt    | 31.34 (2) | 24.80 (3) | 0         | 0         | 0         |           |           |           |           |           |
| AV       | FU-BaP   | 0         | 0         | 0         | 0         | 0         | 0         | 0.61 (12) | 0         | 0         | 0         |
| AV       | FU-BeF   | 0         | 0         | 0         | 0         | 0         | 0         | 0         | 0         | 0         | 0         |
| AV       | FU-BFe   | 0         | 0         | 0         | 0         | 0         | 0         | 2.49 (10) | 0         | 0         | 0         |
| AV       | FU-ChD   | 0         | 0         | 0         | 0         | 0         | 0         | 9.69 (4)  | 0         | 0         | 0         |
| AV       | FU-CSD   | 0         | 0         | 30.44 (2) | 46.74 (2) | 67.89 (1) | 0         | 7.28 (6)  | 21.04 (2) | 46.91 (2) | 52.10 (1) |
| AV       | FU-CSF   | 0         | 0         | 0         | 0         | 32.11 (2) | 0         | 1.52 (11) | 2.91 (6)  | 0         | 21.38 (3) |
| AV       | FU-CSW   | 0         | 0         | 0         | 0         | 0         | 0         | 6.58 (8)  | 0         | 0         | 0         |
| AV       | FU-FPI   | 0         | 0         | 0         | 0         | 0         | 0         | 10.57 (3) | 0         | 0         | 0         |
| AV       | FU-LPr   | 0         | 38.96 (1) | 69.56 (1) | 53.26 (1) | 0         | 0         | 20.60 (1) | 36.27 (1) | 53.09 (1) | 26.53 (2) |
| AV       | FU-Pla   | 0         | 0         | 0         | 0         | 0         | 0         | 6.81 (7)  | 9.76 (5)  | 0         | 0         |
| AV       | FU-RBS   | 0         | 0         | 0         | 0         | 0         | 0         | 7.52 (5)  | 20.13 (3) | 0         | 0         |
| AV       | FU-RVe   | 0         | 0         | 0         | 0         | 0         | 0         | 6.49 (9)  | 0         | 0         | 0         |
| AV       | FU-Sub   | 0         | 0         | 0         | 0         | 0         | 0         | 19.83 (2) | 9.88 (4)  | 0         | 0         |
| Gobiobio |          |           |           |           |           |           |           |           |           |           |           |
| TV       | DisM     | 31.72 (2) | 37.52 (2) | 6.44 (8)  | 0         | 0         |           |           |           |           |           |
| TV       | SOSh     | 0         | 0         | 0         | 0         | 0         |           |           |           |           |           |
| TV       | SOSSt    | 68.28 (1) | 62.48 (1) | 10.37 (4) | 0         | 3.07 (4)  |           |           |           |           |           |
| AV       | FU-BaP   | 0         | 0         | 0         | 0         | 0         | 0         | 0         | 0         | 0         | 0         |
| AV       | FU-BeF   | 0         | 0         | 0         | 0         | 0         | 0         | 0         | 0         | 0         | 0         |
| AV       | FU-BFe   | 0         | 0         | 0         | 0         | 0         | 0         | 0         | 0         | 0         | 0         |
| AV       | FU-ChD   | 0         | 0         | 14.42 (2) | 0         | 0         | 28.04 (2) | 28.68 (3) | 17.33 (3) | 0         | 0         |
| AV       | FU-CSD   | 0         | 0         | 31.11 (1) | 93.87 (1) | 89.85 (1) | 71.96 (1) | 36.19 (1) | 32.93 (1) | 95.56 (1) | 94.93 (1) |
| AV       | FU-CSF   | 0         | 0         | 0         | 0         | 0         | 0         | 0         | 0         | 0         | 0         |
| AV       | FU-CSW   | 0         | 0         | 0         | 0         | 3.60 (2)  | 0         | 35.14 (2) | 0         | 0         | 0         |
| AV       | FU-FPI   | 0         | 0         | 0         | 0         | 0         | 0         | 0         | 9.69 (5)  | 0         | 0         |
| AV       | FU-LPr   | 0         | 0         | 12.29 (3) | 0         | 0         | 0         | 0         | 17.35 (2) | 0         | 0         |
| AV       | FU-Pla   | 0         | 0         | 8.62 (6)  | 6.13 (2)  | 3.48 (3)  | 0         | 0         | 9.23 (6)  | 4.44 (2)  | 5.07 (2)  |
| AV       | FU-RBS   | 0         | 0         | 6.78 (7)  | 0         | 0         | 0         | 0         | 0         | 0         | 0         |
| AV       | FU-RVe   | 0         | 0         | 9.97 (5)  | 0         | 0         | 0         | 0         | 13.47 (4) | 0         | 0         |
| AV       | FU-Sub   | 0         | 0         | 0         | 0         | 0         | 0         | 0         | 0         | 0         | 0         |
| Gymnrnua |          |           |           |           |           |           |           |           |           |           |           |
| TV       | DisM     | 36.14 (2) | 40.71 (2) | 18.44 (3) | 18.32 (3) | 38.14 (2) |           |           |           |           |           |
| TV       | SOSh     | 47.85 (1) | 0         | 19.87 (2) | 0         | 0         |           |           |           |           |           |

| Dataset  | Variable           | incl. TV  |           |           |           |           | excl. TV  |           |           |           |           |
|----------|--------------------|-----------|-----------|-----------|-----------|-----------|-----------|-----------|-----------|-----------|-----------|
|          |                    | 0         | 200       | 1000      | 2500      | 4000      | 0         | 200       | 1000      | 2500      | 4000      |
| TV       | SOS <sub>t</sub>   | 0         | 0         | 0         | 0         | 0         |           |           |           |           |           |
| AV       | FU-BaP             | 0         | 0         | 0         | 0         | 0         | 0         | 0         | 0.74 (9)  | 0         | 0         |
| AV       | FU-BeF             | 0         | 0         | 0         | 0         | 0         | 0         | 0         | 0         | 0         | 0         |
| AV       | FU-BFe             | 0         | 0         | 0         | 0         | 0         | 0         | 0         | 0.88 (8)  | 0         | 0         |
| AV       | FU-ChD             | 0         | 0         | 0         | 0         | 0         | 0         | 0         | 0.41 (11) | 0         | 0         |
| AV       | FU-CSD             | 9.07 (3)  | 59.29 (1) | 27.62 (1) | 33.45 (1) | 61.86 (1) | 76.12 (1) | 60.20 (1) | 66.97 (1) | 51.79 (1) | 69.92 (1) |
| AV       | FU-CSF             | 0         | 0         | 0.32 (11) | 0         | 0         | 0         | 0         | 0.55 (10) | 0         | 0         |
| AV       | FU-CSW             | 0         | 0         | 2.60 (9)  | 2.03 (8)  | 0         | 0         | 0         | 2.00 (7)  | 0         | 0         |
| AV       | FU-FP <sub>l</sub> | 0         | 0         | 0.80 (10) | 0         | 0         | 0         | 0         | 0.26 (12) | 0         | 0         |
| AV       | FU-LPr             | 0         | 0         | 7.70 (5)  | 3.23 (6)  | 0         | 23.88 (2) | 39.80 (2) | 8.71 (3)  | 0         | 0         |
| AV       | FU-Pla             | 0         | 0         | 12.64 (4) | 2.17 (7)  | 0         | 0         | 0         | 9.14 (2)  | 0         | 30.08 (2) |
| AV       | FU-RBS             | 0         | 0         | 2.80 (7)  | 29.99 (2) | 0         | 0         | 0         | 3.06 (5)  | 48.21 (2) | 0         |
| AV       | FU-RVe             | 6.94 (4)  | 0         | 4.53 (6)  | 4.91 (5)  | 0         | 0         | 0         | 4.33 (4)  | 0         | 0         |
| AV       | FU-Sub             | 0         | 0         | 2.68 (8)  | 5.91 (4)  | 0         | 0         | 0         | 2.93 (6)  | 0         | 0         |
| Leucscus |                    |           |           |           |           |           |           |           |           |           |           |
| TV       | DisM               | 45.29 (1) | 25.04 (1) | 19.66 (1) | 20.67 (2) | 27.65 (2) |           |           |           |           |           |
| TV       | SOS <sub>h</sub>   | 0         | 1.15 (12) | 1.31 (14) | 0         | 0         |           |           |           |           |           |
| TV       | SOS <sub>t</sub>   | 10.73 (4) | 4.25 (9)  | 3.14 (10) | 0         | 0         |           |           |           |           |           |
| AV       | FU-BaP             | 0         | 0         | 1.07 (15) | 0         | 0         | 0         | 0.18 (12) | 0         | 0         | 0         |
| AV       | FU-BeF             | 0         | 0         | 0         | 0         | 0         | 0         | 0         | 0         | 0         | 0         |
| AV       | FU-BFe             | 0         | 0         | 2.75 (11) | 9.90 (5)  | 18.98 (4) | 0         | 0.35 (11) | 2.05 (10) | 8.96 (5)  | 25.15 (3) |
| AV       | FU-ChD             | 6.82 (5)  | 11.41 (4) | 3.79 (7)  | 19.59 (3) | 30.76 (1) | 32.69 (2) | 20.62 (1) | 7.64 (5)  | 25.83 (2) | 43.93 (1) |
| AV       | FU-CSD             | 0         | 0         | 3.75 (8)  | 6.82 (6)  | 0         | 0         | 1.02 (10) | 5.79 (7)  | 8.91 (6)  | 0         |
| AV       | FU-CSF             | 20.63 (2) | 15.00 (2) | 17.72 (2) | 22.72 (1) | 22.61 (3) | 36.75 (1) | 19.43 (2) | 23.59 (1) | 27.05 (1) | 30.91 (2) |
| AV       | FU-CSW             | 0         | 7.18 (5)  | 4.98 (6)  | 6.13 (7)  | 0         | 0         | 9.89 (5)  | 6.88 (6)  | 9.89 (4)  | 0         |
| AV       | FU-FP <sub>l</sub> | 0         | 5.92 (7)  | 2.02 (13) | 0         | 0         | 0         | 12.70 (4) | 1.50 (11) | 0         | 0         |
| AV       | FU-LPr             | 0         | 5.03 (8)  | 7.72 (5)  | 0         | 0         | 0         | 5.96 (7)  | 9.09 (4)  | 0         | 0         |
| AV       | FU-Pla             | 16.53 (3) | 6.37 (6)  | 16.79 (3) | 0         | 0         | 30.56 (3) | 7.07 (6)  | 22.10 (2) | 0         | 0         |
| AV       | FU-RBS             | 0         | 3.02 (11) | 3.30 (9)  | 0         | 0         | 0         | 3.10 (9)  | 2.39 (9)  | 0         | 0         |
| AV       | FU-RVe             | 0         | 3.74 (10) | 2.47 (12) | 0         | 0         | 0         | 4.08 (8)  | 3.59 (8)  | 0         | 0         |
| AV       | FU-Sub             | 0         | 11.90 (3) | 9.52 (4)  | 14.18 (4) | 0         | 0         | 15.59 (3) | 15.37 (3) | 19.36 (3) | 0         |
| Percilis |                    |           |           |           |           |           |           |           |           |           |           |
| TV       | DisM               | 0         | 0         | 0         | 0         | 0         |           |           |           |           |           |
| TV       | SOS <sub>h</sub>   | 72.55 (1) | 74.23 (1) | 58.33 (1) | 0         | 15.71 (3) |           |           |           |           |           |
| TV       | SOS <sub>t</sub>   | 27.45 (2) | 25.77 (2) | 18.23 (3) | 8.35 (3)  | 8.76 (6)  |           |           |           |           |           |
| AV       | FU-BaP             | 0         | 0         | 0         | 0         | 0         | 0         | 0         | 0         | 0         | 0         |
| AV       | FU-BeF             | 0         | 0         | 0         | 0         | 0         | 0         | 0         | 0         | 0         | 0         |
| AV       | FU-BFe             | 0         | 0         | 0         | 0         | 0         | 0         | 0         | 0         | 0         | 0         |

| Dataset  | Variable | incl. TV  |           |           |           |           | excl. TV  |           |           |           |           |
|----------|----------|-----------|-----------|-----------|-----------|-----------|-----------|-----------|-----------|-----------|-----------|
|          |          | 0         | 200       | 1000      | 2500      | 4000      | 0         | 200       | 1000      | 2500      | 4000      |
| AV       | FU-ChD   | 0         | 0         | 0         | 0         | 0         | 28.45 (1) | 18.08 (3) | 28.50 (2) | 0         | 0         |
| AV       | FU-CSD   | 0         | 0         | 23.44 (2) | 63.91 (1) | 34.82 (1) | 27.30 (2) | 39.94 (1) | 71.50 (1) | 72.60 (1) | 77.87 (1) |
| AV       | FU-CSF   | 0         | 0         | 0         | 0         | 18.82 (2) | 7.10 (5)  | 0         | 0         | 0         | 0         |
| AV       | FU-CSW   | 0         | 0         | 0         | 0         | 0         | 0         | 15.87 (4) | 0         | 0         | 0         |
| AV       | FU-FPI   | 0         | 0         | 0         | 0         | 0         | 15.47 (4) | 26.11 (2) | 0         | 0         | 0         |
| AV       | FU-LPr   | 0         | 0         | 0         | 0         | 11.11 (4) | 0         | 0         | 0         | 0         | 0         |
| AV       | FU-Pla   | 0         | 0         | 0         | 27.74 (2) | 10.78 (5) | 21.68 (3) | 0         | 0         | 27.40 (2) | 22.13 (2) |
| AV       | FU-RBS   | 0         | 0         | 0         | 0         | 0         | 0         | 0         | 0         | 0         | 0         |
| AV       | FU-RVe   | 0         | 0         | 0         | 0         | 0         | 0         | 0         | 0         | 0         | 0         |
| AV       | FU-Sub   | 0         | 0         | 0         | 0         | 0         | 0         | 0         | 0         | 0         | 0         |
| Phoxinus |          |           |           |           |           |           |           |           |           |           |           |
| TV       | DisM     | 34.47 (1) | 21.87 (1) | 19.65 (1) | 17.21 (3) | 12.75 (4) |           |           |           |           |           |
| TV       | SOSh     | 25.79 (2) | 9.82 (4)  | 11.16 (4) | 9.07 (5)  | 2.00 (10) |           |           |           |           |           |
| TV       | SOSSt    | 3.37 (8)  | 1.33 (12) | 0         | 0         | 0         |           |           |           |           |           |
| AV       | FU-BaP   | 0         | 0         | 1.02 (13) | 0         | 2.78 (8)  | 0.33 (12) | 0         | 0         | 0         | 6.43 (5)  |
| AV       | FU-BeF   | 0         | 0         | 0         | 0         | 0         | 0         | 0         | 0         | 0         | 0         |
| AV       | FU-BFe   | 0         | 0.68 (14) | 0         | 0         | 0         | 5.00 (8)  | 0         | 0         | 0         | 0         |
| AV       | FU-ChD   | 9.33 (3)  | 20.17 (2) | 11.46 (3) | 8.79 (6)  | 12.81 (3) | 27.42 (1) | 28.49 (1) | 19.26 (2) | 12.94 (4) | 13.87 (3) |
| AV       | FU-CSD   | 1.29 (11) | 7.07 (5)  | 15.47 (2) | 20.59 (2) | 28.98 (1) | 13.50 (2) | 12.61 (3) | 20.01 (1) | 30.16 (2) | 31.01 (1) |
| AV       | FU-CSF   | 5.76 (4)  | 3.07 (11) | 3.73 (9)  | 0         | 0         | 9.01 (4)  | 4.64 (7)  | 5.46 (9)  | 0         | 3.72 (9)  |
| AV       | FU-CSW   | 4.82 (6)  | 6.76 (6)  | 6.26 (7)  | 0         | 1.82 (11) | 8.66 (5)  | 10.01 (5) | 9.90 (4)  | 0         | 2.29 (10) |
| AV       | FU-FPI   | 0         | 6.03 (7)  | 3.01 (11) | 6.52 (7)  | 6.23 (6)  | 7.39 (6)  | 10.76 (4) | 6.60 (6)  | 9.77 (5)  | 6.93 (4)  |
| AV       | FU-LPr   | 5.38 (5)  | 4.51 (8)  | 4.63 (8)  | 14.05 (4) | 6.87 (5)  | 2.54 (11) | 3.86 (9)  | 3.73 (10) | 15.28 (3) | 5.36 (6)  |
| AV       | FU-Pla   | 3.25 (9)  | 3.17 (10) | 11.09 (5) | 23.76 (1) | 19.27 (2) | 4.37 (9)  | 4.19 (8)  | 14.81 (3) | 31.84 (1) | 21.89 (2) |
| AV       | FU-RBS   | 2.80 (10) | 10.67 (3) | 6.59 (6)  | 0         | 0         | 10.98 (3) | 15.71 (2) | 8.85 (5)  | 0         | 0         |
| AV       | FU-RVe   | 3.75 (7)  | 3.79 (9)  | 2.48 (12) | 0         | 3.75 (7)  | 6.98 (7)  | 7.20 (6)  | 5.70 (7)  | 0         | 3.99 (8)  |
| AV       | FU-Sub   | 0         | 1.06 (13) | 3.44 (10) | 0         | 2.75 (9)  | 3.82 (10) | 2.53 (10) | 5.67 (8)  | 0         | 4.52 (7)  |
| Pungtius |          |           |           |           |           |           |           |           |           |           |           |
| TV       | DisM     | 13.37 (3) | 0         | 9.70 (7)  | 0         | 0         |           |           |           |           |           |
| TV       | SOSh     | 0.87 (9)  | 0         | 0         | 0         | 0         |           |           |           |           |           |
| TV       | SOSSt    | 0.20 (13) | 0         | 0         | 0         | 0         |           |           |           |           |           |
| AV       | FU-BaP   | 0         | 0         | 0         | 0         | 0         | 0         | 0         | 0         | 0         | 0         |
| AV       | FU-BeF   | 0         | 0         | 0         | 0         | 0         | 0         | 0         | 0         | 0         | 0         |
| AV       | FU-BFe   | 0         | 0         | 3.46 (8)  | 26.57 (2) | 19.87 (4) | 0         | 0         | 4.73 (6)  | 0         | 14.16 (5) |
| AV       | FU-ChD   | 34.38 (1) | 44.26 (1) | 12.51 (3) | 0         | 0         | 52.52 (1) | 39.74 (1) | 14.46 (5) | 0         | 6.53 (6)  |
| AV       | FU-CSD   | 0.63 (11) | 0         | 0         | 0         | 0         | 0         | 0         | 0         | 0         | 0         |
| AV       | FU-CSF   | 4.14 (7)  | 0         | 18.21 (2) | 12.15 (3) | 27.05 (2) | 7.34 (4)  | 0         | 22.07 (2) | 23.97 (2) | 21.22 (2) |
| AV       | FU-CSW   | 0.57 (12) | 0         | 10.97 (4) | 53.87 (1) | 23.09 (3) | 0         | 0         | 15.47 (4) | 76.03 (1) | 20.50 (3) |

| Dataset  | Variable | incl. TV  |           |           |           |           | excl. TV  |           |           |           |           |
|----------|----------|-----------|-----------|-----------|-----------|-----------|-----------|-----------|-----------|-----------|-----------|
|          |          | 0         | 200       | 1000      | 2500      | 4000      | 0         | 200       | 1000      | 2500      | 4000      |
| AV       | FU-FPI   | 11.09 (4) | 0         | 0         | 0         | 0         | 0         | 0         | 0         | 0         | 14.44 (4) |
| AV       | FU-LPr   | 7.98 (5)  | 25.08 (3) | 10.55 (5) | 7.41 (4)  | 30.00 (1) | 0         | 29.03 (3) | 17.55 (3) | 0         | 23.15 (1) |
| AV       | FU-Pla   | 17.58 (2) | 30.65 (2) | 24.75 (1) | 0         | 0         | 27.80 (2) | 31.23 (2) | 25.72 (1) | 0         | 0         |
| AV       | FU-RBS   | 5.66 (6)  | 0         | 9.84 (6)  | 0         | 0         | 12.35 (3) | 0         | 0         | 0         | 0         |
| AV       | FU-RVe   | 2.69 (8)  | 0         | 0         | 0         | 0         | 0         | 0         | 0         | 0         | 0         |
| AV       | FU-Sub   | 0.83 (10) | 0         | 0         | 0         | 0         | 0         | 0         | 0         | 0         | 0         |
| Rutilius |          |           |           |           |           |           |           |           |           |           |           |
| TV       | DisM     | 0         | 0         | 0         | 0         | 0         |           |           |           |           |           |
| TV       | SOSh     | 0         | 0         | 0         | 0         | 0         |           |           |           |           |           |
| TV       | SOSSt    | 75.41 (1) | 33.64 (2) | 50.82 (1) | 50.05 (1) | 67.85 (1) |           |           |           |           |           |
| AV       | FU-BaP   | 0         | 0         | 0         | 0         | 0         | 0         | 0         | 0         | 0         | 0         |
| AV       | FU-BeF   | 0         | 0         | 0         | 0         | 0         | 0         | 0         | 0         | 0         | 0         |
| AV       | FU-BFe   | 0         | 0         | 0         | 0         | 0         | 0         | 0         | 0         | 0         | 0         |
| AV       | FU-ChD   | 0         | 0         | 0         | 0         | 0         | 19.16 (4) | 0         | 0         | 0         | 0         |
| AV       | FU-CSD   | 0         | 0         | 0         | 49.95 (2) | 0         | 24.82 (2) | 0         | 41.58 (2) | 70.64 (1) | 62.66 (1) |
| AV       | FU-CSF   | 0         | 0         | 0         | 0         | 0         | 0         | 0         | 0         | 0         | 0         |
| AV       | FU-CSW   | 24.59 (2) | 43.73 (1) | 49.18 (2) | 0         | 0         | 35.95 (1) | 64.85 (1) | 58.42 (1) | 29.36 (2) | 0         |
| AV       | FU-FPI   | 0         | 22.63 (3) | 0         | 0         | 0         | 0         | 35.15 (2) | 0         | 0         | 0         |
| AV       | FU-LPr   | 0         | 0         | 0         | 0         | 32.15 (2) | 0         | 0         | 0         | 0         | 37.34 (2) |
| AV       | FU-Pla   | 0         | 0         | 0         | 0         | 0         | 0         | 0         | 0         | 0         | 0         |
| AV       | FU-RBS   | 0         | 0         | 0         | 0         | 0         | 0         | 0         | 0         | 0         | 0         |
| AV       | FU-RVe   | 0         | 0         | 0         | 0         | 0         | 0         | 0         | 0         | 0         | 0         |
| AV       | FU-Sub   | 0         | 0         | 0         | 0         | 0         | 20.07 (3) | 0         | 0         | 0         | 0         |
| Salmalar |          |           |           |           |           |           |           |           |           |           |           |
| TV       | DisM     | 0         | 0         | 0         | 0         | 0         |           |           |           |           |           |
| TV       | SOSh     | 83.87 (1) | 67.78 (1) | 65.06 (1) | 49.52 (1) | 9.15 (4)  |           |           |           |           |           |
| TV       | SOSSt    | 0         | 0         | 0         | 0         | 0         |           |           |           |           |           |
| AV       | FU-BaP   | 0         | 0         | 2.47 (5)  | 0         | 0         | 0         | 0         | 9.20 (3)  | 0.32 (10) | 0         |
| AV       | FU-BeF   | 0         | 0         | 0         | 0         | 0         | 0         | 0         | 0         | 0         | 0         |
| AV       | FU-BFe   | 0         | 0         | 7.94 (3)  | 18.50 (3) | 51.17 (1) | 0         | 0         | 0         | 15.80 (3) | 69.68 (1) |
| AV       | FU-ChD   | 16.13 (2) | 11.26 (3) | 17.53 (2) | 31.98 (2) | 11.37 (3) | 46.16 (1) | 41.63 (1) | 61.42 (1) | 26.37 (2) | 30.32 (2) |
| AV       | FU-CSD   | 0         | 0         | 1.83 (6)  | 0         | 7.07 (5)  | 24.26 (2) | 28.61 (3) | 21.86 (2) | 12.85 (4) | 0         |
| AV       | FU-CSF   | 0         | 0         | 0         | 0         | 14.76 (2) | 9.75 (3)  | 0         | 0         | 3.18 (6)  | 0         |
| AV       | FU-CSW   | 0         | 0         | 0         | 0         | 0         | 2.99 (8)  | 0         | 0         | 0         | 0         |
| AV       | FU-FPI   | 0         | 0         | 0         | 0         | 1.18 (8)  | 0         | 0         | 0         | 0.12 (11) | 0         |
| AV       | FU-LPr   | 0         | 0         | 0         | 0         | 0         | 1.68 (9)  | 0         | 0         | 1.15 (9)  | 0         |
| AV       | FU-Pla   | 0         | 20.96 (2) | 5.18 (4)  | 0         | 1.92 (7)  | 3.91 (5)  | 29.76 (2) | 7.53 (4)  | 29.55 (1) | 0         |
| AV       | FU-RBS   | 0         | 0         | 0         | 0         | 3.40 (6)  | 3.33 (7)  | 0         | 0         | 2.40 (7)  | 0         |

| Dataset  | Variable | incl. TV  |           |           |           |           | excl. TV  |           |           |           |           |
|----------|----------|-----------|-----------|-----------|-----------|-----------|-----------|-----------|-----------|-----------|-----------|
|          |          | 0         | 200       | 1000      | 2500      | 4000      | 0         | 200       | 1000      | 2500      | 4000      |
| AV       | FU-RVe   | 0         | 0         | 0         | 0         | 0         | 3.34 (6)  | 0         | 0         | 1.54 (8)  | 0         |
| AV       | FU-Sub   | 0         | 0         | 0         | 0         | 0         | 4.58 (4)  | 0         | 0         | 6.71 (5)  | 0         |
| Salmario |          |           |           |           |           |           |           |           |           |           |           |
| TV       | DisM     | 85.62 (1) | 60.28 (1) | 56.88 (1) | 53.61 (1) | 50.94 (1) |           |           |           |           |           |
| TV       | SOSh     | 0         | 0         | 0         | 0         | 0         |           |           |           |           |           |
| TV       | SOSSt    | 10.65 (2) | 5.16 (6)  | 0         | 0         | 0         |           |           |           |           |           |
| AV       | FU-BaP   | 0         | 0         | 0         | 2.01 (10) | 1.60 (11) | 0         | 0         | 0         | 3.32 (9)  | 5.81 (7)  |
| AV       | FU-BeF   | 0         | 0         | 0         | 0         | 0         | 0         | 0         | 0         | 0         | 0         |
| AV       | FU-BFe   | 0         | 0         | 0         | 3.52 (7)  | 2.43 (9)  | 0         | 0         | 0         | 5.02 (8)  | 5.66 (8)  |
| AV       | FU-ChD   | 3.72 (3)  | 2.71 (7)  | 0         | 0.51 (13) | 0.64 (12) | 63.44 (1) | 20.93 (3) | 0         | 1.65 (11) | 2.63 (11) |
| AV       | FU-CSD   | 0         | 0         | 16.72 (3) | 8.74 (2)  | 8.73 (3)  | 0         | 0         | 39.07 (1) | 16.94 (2) | 14.85 (2) |
| AV       | FU-CSF   | 0         | 0         | 0         | 2.86 (9)  | 3.11 (8)  | 0         | 0         | 0         | 6.16 (6)  | 4.58 (9)  |
| AV       | FU-CSW   | 0         | 0         | 0         | 8.56 (3)  | 3.30 (7)  | 0         | 0         | 0         | 12.69 (4) | 7.70 (6)  |
| AV       | FU-FPI   | 0         | 12.40 (2) | 0         | 4.76 (5)  | 4.83 (5)  | 0         | 52.37 (1) | 31.51 (2) | 21.57 (1) | 14.04 (4) |
| AV       | FU-LPr   | 0         | 0         | 0         | 1.80 (12) | 4.20 (6)  | 0         | 0         | 0         | 3.28 (10) | 4.30 (10) |
| AV       | FU-Pla   | 0         | 8.82 (3)  | 0         | 3.63 (6)  | 7.17 (4)  | 0         | 26.70 (2) | 0         | 13.12 (3) | 16.63 (1) |
| AV       | FU-RBS   | 0         | 5.45 (4)  | 0         | 1.93 (11) | 0         | 0         | 0         | 0         | 0         | 0         |
| AV       | FU-RVe   | 0         | 5.17 (5)  | 0         | 5.08 (4)  | 10.85 (2) | 0         | 0         | 29.42 (3) | 5.28 (7)  | 14.52 (3) |
| AV       | FU-Sub   | 0         | 0         | 26.40 (2) | 2.98 (8)  | 2.20 (10) | 36.56 (2) | 0         | 0         | 10.96 (5) | 9.28 (5)  |
| Tincinca |          |           |           |           |           |           |           |           |           |           |           |
| TV       | DisM     | 42.45 (1) | 30.77 (1) | 0         | 0         | 0         |           |           |           |           |           |
| TV       | SOSh     | 0         | 0         | 0         | 0         | 0         |           |           |           |           |           |
| TV       | SOSSt    | 0         | 0         | 0         | 0         | 0         |           |           |           |           |           |
| AV       | FU-BaP   | 0         | 0         | 0         | 0         | 0         | 0         | 0         | 0         | 0         | 0         |
| AV       | FU-BeF   | 0         | 0         | 0         | 0         | 0         | 0         | 0         | 0         | 0         | 0         |
| AV       | FU-BFe   | 0         | 0         | 24.99 (3) | 0         | 22.14 (3) | 0         | 0         | 23.82 (3) | 0         | 23.38 (2) |
| AV       | FU-ChD   | 15.90 (2) | 4.71 (6)  | 0         | 26.78 (2) | 23.12 (2) | 23.84 (3) | 0         | 0         | 25.49 (2) | 22.67 (3) |
| AV       | FU-CSD   | 0         | 0         | 0         | 0         | 0         | 0         | 0         | 0         | 0         | 0         |
| AV       | FU-CSF   | 11.82 (4) | 6.37 (5)  | 41.63 (1) | 73.22 (1) | 54.74 (1) | 25.81 (2) | 0         | 40.75 (1) | 74.51 (1) | 53.95 (1) |
| AV       | FU-CSW   | 11.08 (5) | 26.88 (2) | 0         | 0         | 0         | 20.22 (4) | 51.68 (1) | 0         | 0         | 0         |
| AV       | FU-FPI   | 0         | 0         | 0         | 0         | 0         | 0         | 0         | 0         | 0         | 0         |
| AV       | FU-LPr   | 3.68 (6)  | 9.58 (4)  | 0         | 0         | 0         | 0         | 0         | 0         | 0         | 0         |
| AV       | FU-Pla   | 15.06 (3) | 21.68 (3) | 33.38 (2) | 0         | 0         | 30.13 (1) | 48.32 (2) | 35.43 (2) | 0         | 0         |
| AV       | FU-RBS   | 0         | 0         | 0         | 0         | 0         | 0         | 0         | 0         | 0         | 0         |
| AV       | FU-RVe   | 0         | 0         | 0         | 0         | 0         | 0         | 0         | 0         | 0         | 0         |
| AV       | FU-Sub   | 0         | 0         | 0         | 0         | 0         | 0         | 0         | 0         | 0         | 0         |
